1 **Title:**

2 **Tetanus neurotoxin sensitive SNARE-mediated glial signaling limits**  
3 **motoneuronal excitability**

4

5 **Authors**

6 Mathias A. Böhme\*, Anthony W. McCarthy, Monika Berezeckaja, Kristina Ponimaskin and  
7 Alexander M. Walter\*

8

9 **Affiliation**

10 Leibniz-Forschungsinstitut für Molekulare Pharmakologie (FMP), FMP im  
11 CharitéCrossOver, 10117 Berlin, Germany.

12 **ORCID identifier:** Mathias A. Böhme: [orcid.org/0000-0002-0947-9172](https://orcid.org/0000-0002-0947-9172); Anthony W.  
13 McCarthy: [orcid.org/0000-0002-3771-351X](https://orcid.org/0000-0002-3771-351X); Alexander M. Walter: [orcid.org/0000-0001-](https://orcid.org/0000-0001-5646-4750)  
14 [5646-4750](https://orcid.org/0000-0001-5646-4750)

15

16 \*Correspondence to: Alexander M. Walter ([awalter@fmp-berlin.de](mailto:awalter@fmp-berlin.de)) or Mathias A. Böhme  
17 ([boehme@fmp-berlin.de](mailto:boehme@fmp-berlin.de)).

18 Editorial correspondence to:

19 [awalter@fmp-berlin.de](mailto:awalter@fmp-berlin.de)

20 Dr. Alexander M. Walter

21 Molecular and Theoretical Neuroscience, Leibniz-Forschungsinstitut für Molekulare  
22 Pharmakologie, Charité Campus Mitte, Charitéplatz 1, 10117 Berlin Germany

23 Tel.: +49 (0)30-450-639-026

24 **Abstract**

25 Peripheral nerves contain motoneuron axons coated by glial cells, which essentially contribute  
26 to function but cellular reactions remain poorly understood. We here identify non-neuronal  
27 Synaptobrevin (Syb) as the essential vesicular SNARE in glia to insulate and metabolically  
28 supply *Drosophila* motoneurons. Interfering with Syb-functionality by glial knockdown, or  
29 glial expression of tetanus neurotoxin light chain (TeNT-LC) caused motonerve  
30 disintegration, blocked axonal transport, induced tetanic muscle hyperactivity and caused  
31 lethal paralysis. Surprisingly, not the established TeNT-LC-target, neuronal Synaptobrevin  
32 (nSyb), is the relevant SNARE, but non-neuronal Synaptobrevin (Syb): Knockdown of Syb-  
33 (but not nSyb-) phenocopied glial TeNT-LC expression whose effects were reverted by a  
34 TeNT-LC-insensitive Syb mutant. We link Syb-necessity to two distinct glia: to establish  
35 nerve insulating septate junctions in subperineurial glia and to integrate monocarboxylate  
36 transporters along the nerve in wrapping glia for motoneuronal metabolic supply. Our study  
37 identifies crucial roles of Syb in glial subtypes for nerve function and pathology, animal  
38 motility and survival.

39

40 **Key words: glia biology / SNAREs / neural excitability / septate junction / glia-neuron**  
41 **metabolic coupling**

## 42 **Introduction**

43 Motor control is mediated by motoneurons of the central nervous system that can convey  
44 electrical information in the form of action potentials (APs) along their axons over large  
45 distances to peripheral body muscles. At the target muscle, motoneuronal APs induce the  
46 release of neurotransmitters (NT) at neuromuscular junctions (NMJs), leading to muscle  
47 excitation and contraction (Kuo and Ehrlich, 2015). Motoneuronal axons are bundled in  
48 nerves which also contain non-neuronal glial cells that separate motoneuron axons from the  
49 surrounding environment and additionally serve essential functions in development,  
50 regeneration, neural metabolism, ion homeostasis and AP propagation (Fields, 2015; Simard  
51 and Nedergaard, 2004; Zuchero and Barres, 2015). The functional importance of proper  
52 neural communication along peripheral nerves is evident from the many, often fatal diseases  
53 in which this is disrupted, including Charcot–Marie–Tooth disease, Guillain-Barré syndrome,  
54 amyotrophic lateral sclerosis, and tetanus (Bleck, 1989; Hardiman et al., 2017; Szigeti and  
55 Lupski, 2009; Willison et al., 2016).

56 The release of chemical transmitters, but also the delivery of proteins and lipids to  
57 different intracellular compartments depends on the fusion of cargo-containing vesicles with  
58 their target organelles. These fusion reactions are mediated by the formation of heat stable,  
59 coiled-coil soluble N-ethylmaleimide-sensitive-factor attachment receptor (SNARE)  
60 complexes between SNARE proteins resident on vesicle (v-SNARE) and target (t-SNARE)  
61 membranes (Bruns and Jahn, 2002; Jahn and Fasshauer, 2012; Jahn and Scheller, 2006).  
62 Synaptic transmission requires the fusion of neurotransmitter (NT) containing synaptic  
63 vesicles (SVs) with the plasma membrane which engages the evolutionarily conserved t-  
64 SNAREs syntaxin-1 and SNAP25 and the v-SNARE Synaptobrevin-2/VAMP2 (Syb2) in  
65 mammals or neuronal Synaptobrevin (nSyb) in *Drosophila* (DiAntonio et al., 1993; Jahn and  
66 Fasshauer, 2012). Tetanus neurotoxin (TeNT) is a potent bacterial toxin that abolishes NT  
67 release by TeNT-light chain (TeNT-LC) mediated cleavage of Syb-2/nSyb (Bruns et al.,

68 1997; Schiavo et al., 1992; Schiavo et al., 2000; Sweeney et al., 1995) while the TeNT-heavy  
69 chain (TeNT-HC) targets the toxin to inhibitory interneurons of the vertebrate spinal cord  
70 (Blum et al., 2012; Blum et al., 2014; Bomba-Warczak et al., 2016; Deinhardt et al., 2006;  
71 Deinhardt and Schiavo, 2005; Erdmann et al., 1975; Lalli et al., 2003; Rummel, 2017;  
72 Schiavo et al., 2000; Schwab and Thoenen, 1976, 1978; Surana et al., 2018; Yeh et al., 2010).  
73 The resulting loss of inhibitory input onto spinal motoneurons causes hyperactivity, spastic  
74 paralysis and ultimately respiratory failure and death (Bleck, 1989; Popoff and Poulain, 2010;  
75 Surana et al., 2018). Despite the availability of functional vaccines, Tetanus still caused  
76 ~25000 death children in 2018 (Source: [www.who.int](http://www.who.int)) making a complete functional  
77 understanding of this disease essential. Interestingly, also glial cells, including the nerve-  
78 isolating peripheral Schwann cells, can take up TeNT (Huba and Hofmann, 1988; Schwab and  
79 Thoenen, 1978) and glial TeNT expression or disruption of its v-SNARE targets  
80 (VAMP2/Syb-2, VAMP3/cellubrevin) affects the function of central neurons (Lee et al.,  
81 2014; Pascual et al., 2005; Perea and Araque, 2007; Schwarz et al., 2017). However, whether  
82 TeNT in glial cells may affect motoneuroal function or even contribute to tetanus pathology  
83 remains unknown.

84 We here report on the unexpected observation that TeNT-LC expression in *Drosophila*  
85 glial cells severely disrupts peripheral nerve morphology and axonal transport of synaptic  
86 material. It furthermore caused motoneuronal hyperactivity and paralysis, typical effects of  
87 TeNT intoxication in higher organisms. Unlike neurons, where TeNT-LC cleaves nSyb and  
88 arrests neurotransmission, in glial cells these effects were caused by the functional loss of  
89 non-neuronal Syb and could be rescued by a TeNT-insensitive Syb-variant. TeNT-LC  
90 expression in axon encircling wrapping glia (WG) reduced monocarboxylate transporters at  
91 the glia/neuronal interface and caused an axonal accumulation of the synaptic protein  
92 Bruchpilot (BRP). Similar aberrant axonal transport was observed upon WG knockdown of  
93 Basigin, a protein that targets monocarboxylate transporters to plasma membranes, suggesting

94 that these effects are due to a disruption in glia-to-neural metabolic supply. In contrast, TeNT-  
95 LC (or Syb-RNAi) expression in subperineurial glial cells additionally disrupted nerve  
96 morphology as well as septate junction formation and in some cases caused aberrant nerve  
97 activity. In conclusion we report on SNARE-mediated reactions in glial cells that are essential  
98 for motor function and whose disruption may cause severe pathology, including tetanus.

## 99 **Results and discussion**

### 100 Expression of TeNT-LC in glial cells disrupts nerve morphology and function

101 Classic experiments revealed TeNT uptake into Schwann cells (Schwab and Thoenen, 1978)  
102 and glial cells exocytose substances influencing neural function possibly in a SNARE-  
103 dependent manner (Carlsen and Perrier, 2014; Christensen et al., 2018; Christensen et al.,  
104 2013; Gucek et al., 2012; Schwarz et al., 2017; Verderio et al., 2012). We therefore wondered  
105 whether TeNT-LC targeted to glial cells could also affect motoneuronal function.

106 Three types of *Drosophila* glial cells are found in a compound organization coating  
107 the segmentally arranged abdominal peripheral nerves (Bittern et al., 2020; Stork et al., 2008)  
108 and Fig. 1A,B), which harbor the sensory- and motoneuron axons (motoneuronal innervation  
109 depicted in Fig 1B, left). We started our investigation by expressing TeNT-LC (Sweeney et  
110 al., 1995) in all glial subtypes using the pan-glial driver Repo-Gal4 (Sepp et al., 2001) and  
111 investigated the influence on larval behavior, peripheral nerve morphology (via staining with  
112 horse-radish peroxidase (HRP) as neuronal membrane marker) and function (Fig. 1C-H).  
113 Surprisingly, pan-glial TeNT-LC expressing larvae were severely paralyzed, hardly able to  
114 move and died at late larval stages (Fig 1C,D and Video 1-3). Additionally, peripheral nerves  
115 of pan-glial TeNT-LC expressing larvae were morphologically severely disrupted and showed  
116 partial defasciculation (Fig. 1E, arrow head for single axon leaving the nerve trunk) and an  
117 expansion of the nerve area (Fig. 1E,F). A recent study reported similar, but locally  
118 constrained nerve swellings upon glial knockdown of the salt-inducible kinase 3 (SIK3), a  
119 central node in a signal transduction pathway controlling glial K<sup>+</sup> and water homeostasis (Li  
120 et al., 2019). In contrast, peripheral nerves of pan-glial TeNT-LC expressing animals showed  
121 a continuous disruption of the entire axonal length although to different degrees. We  
122 quantitatively evaluated the severity of the disruption by categorizing the nerves by their  
123 degree of disintegration (normal: long, thin and smooth nerves (see control images in Fig. 1E  
124 for example); intermediate: slight morphological alterations like single defasciculating axons,

125 slightly increased nerve area; disrupted: complete disintegration of the nerve, defasciculation  
126 of whole parts of the nerve, large expansion of the nerve area). While control groups (larvae  
127 with either the Repo-Gal4 driver or the UAS-TeNT-LC construct alone) almost exclusively  
128 showed normal nerve morphologies, most nerves expressing pan-gial TeNT-LC were  
129 disrupted (Fig. 1F, nerve morphology). Additionally, pan-gial TeNT-LC expression caused a  
130 five-fold increase in the number of spots in the axon containing presynaptic protein BRP  
131 (labelled by immunostaining; Fig 1E,F), indicating a disruption in the synaptic delivery of this  
132 protein.

133       Peripheral nerves contact body wall muscles at NMJs (Fig. 1B) where NTs are  
134 released by motoneuron upon APs which induce depolarization of the muscle membrane  
135 potential, contraction, and finally movement. To investigate whether glial expression of  
136 TeNT-LC affected this we performed recordings of muscle's membrane potential (Fig. 1G,H).  
137 Without stimuli, spontaneous NT release gives rise to 'miniature' excitatory postsynaptic  
138 potentials (mEPSPs) and the amplitudes of these mEPSPs were almost doubled upon pan-gial  
139 TeNT-LC expression compared to controls (Fig. 1G,H, spont.) while their frequency was  
140 similar (*Repo::+*:  $2.054 \pm 0.1678$  Hz, *TeNT-LC::+*:  $2.538 \pm 0.2536$  Hz, *Repo::TeNT-*  
141 *LC*:  $1.874 \pm 0.1812$  Hz; one-way ANOVA with Tukey's multiple comparison test, *Repo::+*  
142 vs. *TeNT-LC::+*:  $p = 0.226$ , *Repo::+* vs. *Repo::TeNT-LC*:  $p = 0.8009$ , *TeNT-LC::+* vs.  
143 *Repo::TeNT-LC*:  $p = 0.0837$ ). Electrical stimulation of the innervating nerve in control  
144 animals evokes a single AP that reliably triggered a single evoked excitatory postsynaptic  
145 potential in the muscle (eEPSP; seen in 8/8 driver control and 7/7 TeNT-LC-construct control  
146 cells; Fig. 1G,H, evoked). In contrast, upon pan-gial TeNT-LC expression, a single stimulus  
147 triggered additional eEPSPs and thus motoneuronal hyperactivity (ranging from 2 to 246  
148 additional events per cell, seen in 10/10 cells; Fig. 1G,H), a typical hallmark of TeNT  
149 intoxication in higher organisms. This is a similar observation to one seen with glial-  
150 knockdown of SIK3, although in that case supernumerary EPSPs also occurred without any

151 stimulation (Li et al., 2019). While the number of eEPSPs elicited per stimulus was increased,  
 152 the average amplitude of the first eEPSPs we observed did not differ from control cells (Fig.  
 153 1G,H), indicating that glial TeNT expression did not disrupt synaptic transmission *per se*.  
 154 Thus, we report that TeNT-LC-mediated interference with SNARE-dependent processes in  
 155 glial cells leads to paralysis, disrupts nerve integrity, impairs axonal transport, and causes  
 156 motoneuronal hyperexcitability.

157

158 **Figure 1**

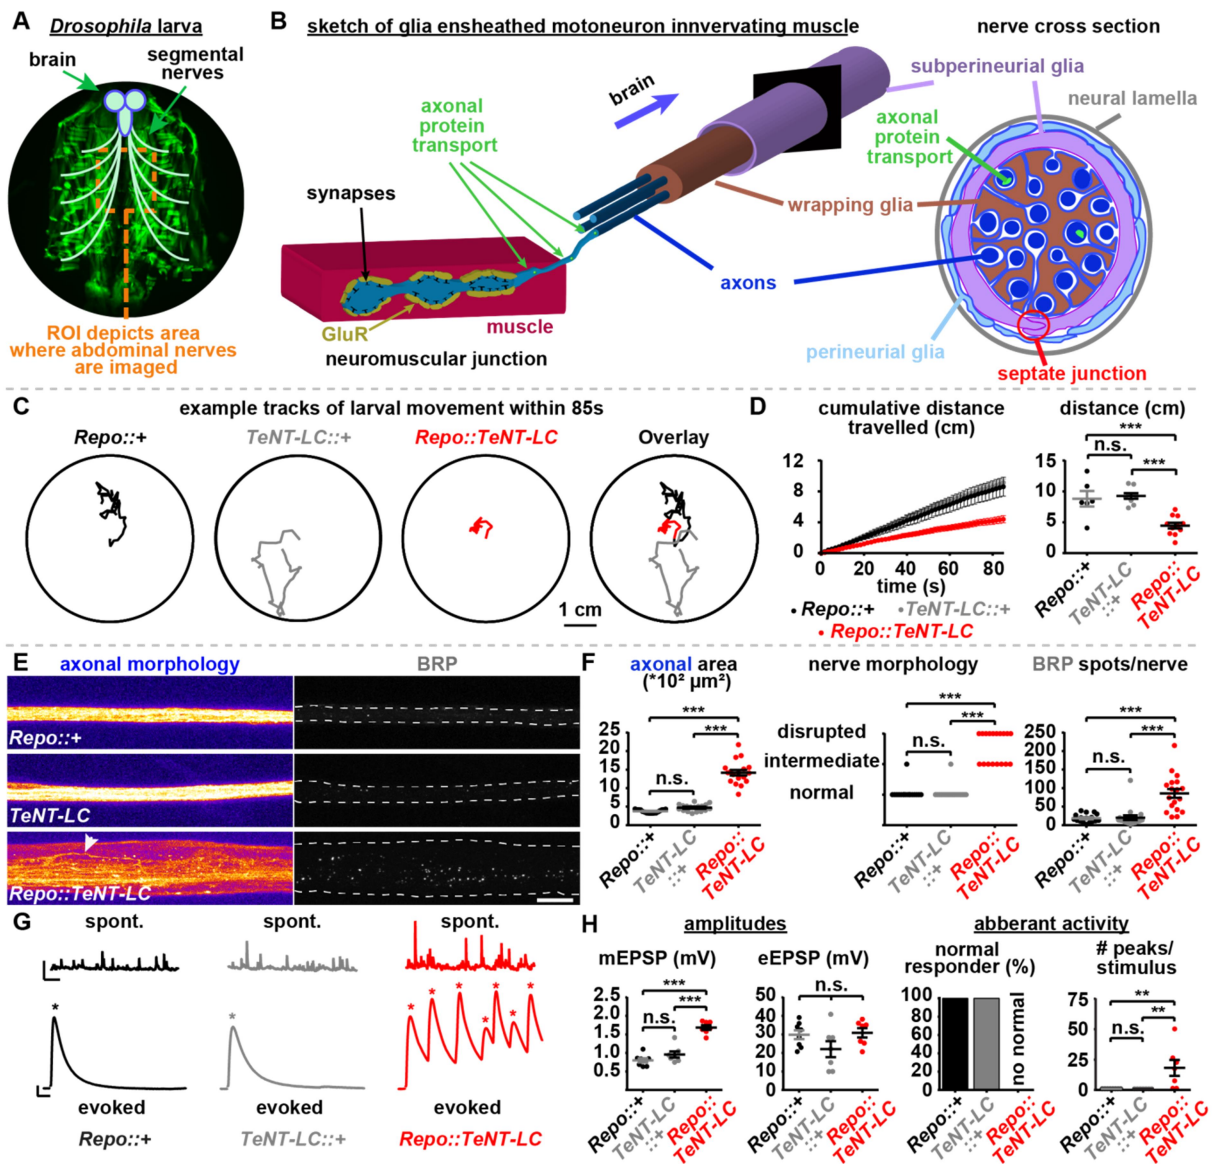

159

160 **Figure 1: Pan-glial TeNT-LC expression causes paralysis, disrupts nerve integrity, and results in**  
 161 **motoneuronal hyperactivity.** A,B Sketches of dissected larvae depicting segmental nerves radiating



162 from the brain (A) containing muscle innervating, glia ensheathed motoneurons (B, left; nerve cross  
163 section, right, according to (Stork et al., 2008)). **C,D** Analysis of larval movement with example tracks  
164 over 85s (C), distances travelled over time (85s; D, left) and comparison of final distances travelled by  
165 3<sup>rd</sup> instar larvae of the indicated genotypes (D, right): *Repo::+* (black), *TeNT-LC::+* (grey) and  
166 *Repo::TeNT-LC* (red). See also Videos 1-3. **E,F** Nerves of segments A2–A4 (E) and quantification of  
167 axonal area, nerve morphology and BRP spots per nerve (F) were investigated in the region of interest  
168 (ROI) illustrated in panel A in 3<sup>rd</sup>-instar larvae of *Repo::+* (black), *TeNT-LC::+* (grey) and  
169 *Repo::TeNT-LC* (red) animals. Dashed line in (E, BRP) indicates nerve area and arrow head indicates  
170 defasciculated single axon. **G,H** Representative mEPSP (spont.) and eEPSP (evoked) traces (G) and  
171 quantification of mEPSP/eEPSP amplitudes, % of recorded cells displaying normal activity (single  
172 eEPSP in response to single stimulation) and the number of response peaks per stimuli in *Repo::+*  
173 (black), *TeNT-LC::+* (grey) and *Repo::TeNT-LC* (red) animals. Asterisks indicate postsynaptic  
174 response peaks (eEPSP). Scale bars: (C) 1 cm; (E) 10  $\mu$ m; (G) mEPSP: 1 s, 2 mV. eEPSP: 25 ms,  
175 5 mV. Statistics: parametric one-way analysis of variance (ANOVA) test, followed by Tukey's  
176 multiple comparison test except for (F, nerve morphology) where a non-parametric Kruskal-Wallis  
177 test was performed. \*\*\* $p \leq 0.001$ ; \*\* $p \leq 0.01$ ; \* $p \leq 0.05$ ; n.s. (not significant)  $p > 0.05$ . (C,D)  
178 *Repo::+*: six larvae; *TeNT::+*: nine larvae; *Repo::TeNT*: 11 larvae; (E,F) *Repo::+*: 17 nerves, six  
179 larvae; *TeNT::+*: 18 nerves, six larvae; *Repo::TeNT*: 18 nerves, six larvae; (G,H) *Repo::+*: 8 cells,  
180 four larvae; *TeNT::+*: 7 cells, four larvae; *Repo::TeNT*: 8 cells, four larvae. All panels show mean  $\pm$   
181 s.e.m.

182

183 Essential glial functions are mediated by Syb but not nSyb

184 We next asked which v-SNARE might be targeted by TeNT-LC in glial cells (Fig. 2A).  
185 Tetanus pathology is caused by Synaptobrevin-2 cleavage in mammalian interneurons  
186 (Schiavo et al., 2000). However, TeNT-LC also cleaves other v-SNAREs, including  
187 VAMP1/Synaptobrevin-1 enriched in spinal cord neurons and the more ubiquitously  
188 expressed VAMP3/cellubrevin in mammals (Carle et al., 2017; Elferink et al., 1989;  
189 McMahon et al., 1993; Patarnello et al., 1993; Schiavo et al., 1992). The *Drosophila* genome  
190 harbors two putative TeNT-LC targets, neuronal-Synaptobrevin (nSyb) which mediates SV  
191 fusion (Deitcher et al., 1998; DiAntonio et al., 1993; Sweeney et al., 1995) and the rather  
192 ubiquitously expressed synaptobrevin (Syb) which is likely involved in more constitutive  
193 vesicular fusion reactions (Chin et al., 1993; Sudhof et al., 1989). TeNT-LC is thought to  
194 specifically cleave *Drosophila* nSyb (Sweeney et al., 1995). However, an alignment of nSyb  
195 and non-neuronal Syb revealed differences mainly in their N- and C-terminal parts while the  
196 central SNARE-motif (Fig. 2B, yellow shaded) is largely conserved (Fig. 2B). Importantly,  
197 the glutamine (Q) – phenylalanine (F) TeNT-LC-cleavage site (Schiavo et al., 1992), is  
198 conserved in both proteins (Fig. 2B, red box).

199 We thus sought to investigate whether disruption of Syb or nSyb was causative for the  
200 observed defects upon TeNT-LC expression by testing whether pan glial (Repo-Gal4)  
201 knockdown of either protein using specific RNAi-lines induced similar effects (Fig. 2C-H).  
202 Pan-glial nSyb knockdown did not change nerve morphology, nerve area or on axonal BRP  
203 presence in comparison to controls (Fig. 2C,D; similar results were obtained with a second  
204 nSyb-RNAi line (#VDRC 49201, data not shown)). In contrast, pan-glial knockdown of non-  
205 neuronal Syb phenocopied pan-glial TeNT-LC expression with largely increased nerve areas,  
206 severely disrupted nerve morphologies and enhanced axonal BRP accumulations (Fig. 2E,F).  
207 Similarly to glial TeNT-LC expression, mEPSP amplitudes were increased and cells exhibited  
208 hyperactive motoneuronal behavior with supernumerary eEPSPs after stimulation (ranging

209 from 2 to 62 additional events per cell, seen in 9/10 cells; Fig. 2G,H) but similar eEPSP  
 210 amplitudes (Fig. 2G,H). Thus, TeNT-LC-mediated impairment of Syb- and not nSyb-function  
 211 in *Drosophila* glial cells is likely responsible for disrupted nerve integrity, axonal  
 212 accumulation of synaptic proteins and hyperactive motoneuronal responses (see also below).

213

214 **Figure 2**

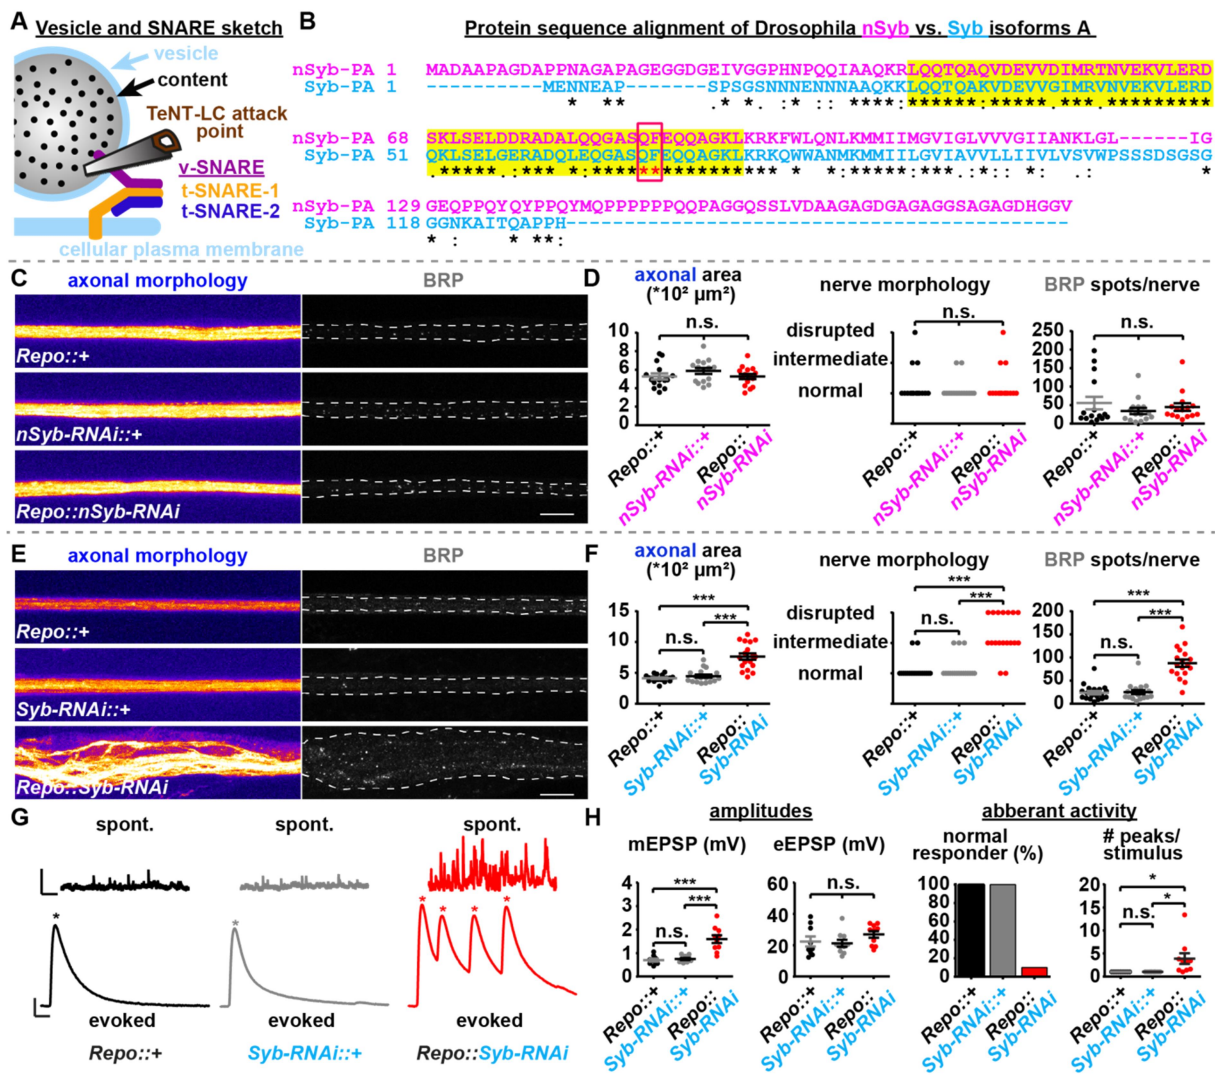

215

216 **Figure 2: Syb but not nSyb is targeted by TeNT-LC in glial cells.** **A** Sketch of a vesicle depicting  
 217 the SNARE proteins and the v-SNARE attack point of TeNT-LC. **B** Sequence alignment of Isoforms  
 218 A of *Drosophila* nSyb (magenta) and Syb (blue). SNARE motif (yellow shaded) and the TeNT-LC  
 219 cleavage site (QF, red box) are highlighted. Alignment performed using Clustal Omega. Gonnet  
 220 PAM250 matrix used to compare sequence substitutions: \* identical aa, : score >0.5, . score <0.5,  
 221 “gap” score below 0. **C-F** Nerves of segments A2–A4 (C,E) and quantification of axonal area, nerve  
 222 morphology and BRP spots per nerve (D,F) from 3<sup>rd</sup>-instar larvae of the indicated genotypes. Dashed

223 line in C,E indicates nerve area. **G,H** Representative mEPSP (spont.) and eEPSP (evoked) traces (G)  
224 and quantification of mEPSP/eEPSP amplitudes, % of recorded cells displaying normal activity  
225 (single eEPSP in response to single stimulation) and the normalized number of response peaks per  
226 stimulus in *Repo::+* (black), *Syb-RNAi::+* (grey) and *Repo::Syb-RNAi* (red) animals. Asterisks  
227 indicate postsynaptic response peaks (eEPSP). Scale bars: (C, E) 10  $\mu$ m; (G) mEPSP: 1 s, 2 mV.  
228 eEPSP: 25 ms, 5 mV. Statistics: parametric one-way analysis of variance (ANOVA) test, followed by  
229 Tukey's multiple comparison test except for (D, F: nerve morphology) where a non-parametric  
230 Kruskal-Wallis test was performed. \*\*\* $p \leq 0.001$ ; \* $p \leq 0.05$ ; n.s. (not significant)  $p > 0.05$ . (C,D)  
231 *Repo::+*: 15 nerves, six larvae; *nSyb-RNAi::+*: 15 nerves, six larvae; *Repo::nSyb-RNAi*: 15 nerves, six  
232 larvae; (E,F) *Repo::+*: 19 nerves, six larvae; *Syb-RNAi::+*: 18 nerves, six larvae; *Repo::Syb-RNAi*: 19  
233 nerves, six larvae; (G,H) *Repo::+*: 9 cells, five larvae; *Syb-RNAi::+*: 10 cells, five larvae; *Repo::Syb-*  
234 *RNAi*: 10 cells, five larvae. All panels show mean  $\pm$  s.e.m.

235

236 Syb disruption in subperineurial glia causes paralysis, distorts nerves and impairs axonal  
237 transport

238 We next speculated how TeNT-LC or Syb-knockdown cause these phenotypes and whether  
239 all glial subtypes are affected. *Drosophila* peripheral axons are supported by three glial types:  
240 wrapping glia (WGs), subperineurial glia (SPGs) and perineurial glia (PGs) ((Stork et al.,  
241 2008) and Fig. 1B). SPG enwrap axons and WG ((Stork et al., 2008) and Figs. 1B & 3A) and  
242 additionally extend to fully cover the NMJ in 35% of cases (investigated using r182-Gal4 (Gli-  
243 Gal4 (Auld et al., 1995; Sepp and Auld, 1999)) mediated expression of membrane associated  
244 GFP (mCD8-GFP); Fig. 3B,C), in line with previous results (Auld et al., 1995; Brink et al.,  
245 2009; Fuentes-Medel et al., 2009; Kerr et al., 2014; Sepp and Auld, 1999).

246 Similarly to pan-glial TeNT-LC expression (Fig. 1C,D and Videos 1-3) SPG TeNT-  
247 LC expressing larvae showed severely reduced locomotion (Fig. 3D,E and Videos 4,5),  
248 displayed distorted nerve morphology and axon BRP accumulation (Fig. 3F,G). In the course  
249 of this study we also found two rare adult escapees of TeNT-LC expressing SPGs which were  
250 also severely paralyzed, showed almost no movement and were even unable to re-orientate to  
251 an upright stance when falling on their back (Video 6). To verify that Syb was the relevant  
252 TeNT target, we generated a TeNT-insensitive Syb variant (as UAS-construct of Syb Isoform  
253 A) by exchanging the glutamine (Q<sub>69</sub>) – phenylalanine (F<sub>70</sub>) TeNT-LC-cleavage site (Fig. 2B)  
254 with Valin (V) – Tryptophan (W) (Regazzi et al., 1996). Co-expression of this TeNT-  
255 insensitive UAS-Syb-QFVW in SPGs almost completely restored locomotion, and rescued  
256 nerve morphology and axonal BRP accumulation (Fig. 3D-G and Video 7). Additionally,  
257 SPG Syb-knockdown also elicited nerve disintegration and axonal BRP accumulation, clearly  
258 implicating Syb as the relevant TeNT target in glial cells (Fig. S1A-C).

259 Electrophysiological recordings of larvae expressing both SPG TeNT-LC or Syb-  
260 RNAi revealed occasional aberrant motoneuronal responses after AP-evoked stimulation  
261 (Fig. S1D-G) but these effects were much weaker than upon pan-glial expression which might

262 be due to the additional contribution of other glial cell types (e.g. wrapping glia, (Li et al.,  
263 2019)) or due to a weaker expression strength of the rL82-Gal4 driver compared to Repo-  
264 Gal4 (Yildirim et al., 2019). We can exclude that TeNT-LC or Syb-RNAi expression kills  
265 SPGs cells as their visualization by simultaneous CD8-GFP expression showed an intact GFP  
266 coverage of investigated nerves similar to control animals (Fig. S2A-D).

267 We next wondered what biological processes may be disrupted upon TeNT-LC  
268 expression in SPGs. By coincidence we discovered that an antibody staining the glutamate  
269 receptor subunit IID (GluRIID, (Qin et al., 2005)) reliably labelled an outer layer of the nerve,  
270 possibly the neural lamella. Though the epitope responsible is unknown, GluRIID staining  
271 revealed extensive lamellar folds and large “voids” within the axonal HRP staining in larvae  
272 expressing Syb-RNAi in SPGs (Fig. S1A,B; neural lamella). These “voids” together with the  
273 morphological nerve phenotypes (disintegration, enlarged nerve area) are qualitatively similar  
274 to observations in mutants that interfere with glial wrapping of peripheral axons or with the  
275 formation of septate junctions (SJs) (Babatz et al., 2018; Leiserson et al., 2000). These SJs  
276 seal off the axon/WG encircling SPGs (Fig 1B, right) to build an occluding barrier for  
277 metabolic insulation (Banerjee et al., 2008; Baumgartner et al., 1996; Carlson et al., 2000;  
278 Schwabe et al., 2005; Stork et al., 2008; Yildirim et al., 2019). We therefore analyzed how  
279 disruption of SJ formation affected peripheral nerve morphology by interfering with a critical  
280 SJ component, the transcellular adhesion protein Neurexin IV (NrxIV; (Babatz et al., 2018;  
281 Baumgartner et al., 1996; Oshima and Fehon, 2011; Stork et al., 2008)). Remarkably, very  
282 similar to TeNT/Syb-RNAi expression, NrxIV-RNAi knockdown in SPGs disrupted nerves,  
283 increased their area and caused axonal BRP-accumulation (6-fold increase in comparison to  
284 controls; compare Fig. 3H,I with 3F,G and Fig. S1A-C). Thus, interference with Syb or SJ  
285 formation in SPGs causes similar effects.

286 SJ formation depends on the delivery of key components (including NrxIV) to the  
287 glial surface likely by exocytosis (Babatz et al., 2018; Tiklova et al., 2010) and we

288 hypothesized that this was driven by Syb. We therefore tested whether TeNT-LC expression  
289 interfered with Nr<sub>x</sub>IV delivery to the SJ by studying its cellular localization using an  
290 endogenous GFP-tag (Nr<sub>x</sub>IV-GFP; (Edenfeld et al., 2006)). In control nerves, Nr<sub>x</sub>IV-GFP  
291 was very restricted to a linear profile along the peripheral nerves (Fig. 3J-L; note peak in  
292 vertical nerve line profil (Fig. 3J,K; top panel, solid green line) and orthogonal nerve cross-  
293 sections revealed a single large GFP signal, indicating proper SJ formation (Fig. 1B; 3L, left).  
294 Remarkably, TeNT expression led to a diffuse, rather unspecific Nr<sub>x</sub>IV-GFP distribution  
295 throughtout the nerve, suggesting a loss of the SJ (Fig. 3J,K bottom panels for two examples  
296 and 3L, right). Our results are consistent with an essential function of Syb in SJ formation  
297 which partially explains the deteriorations observed upon Syb interference.

298         Electrophysiological characterization of Nr<sub>x</sub>IV-RNAi expressing SPGs revealed  
299 increased mEPSP and eEPSP amplitudes (Fig. S2E,F) but unlike pan-glial TeNT-LC/Syb  
300 RNAi expression no hyperactivity was seen (Fig. S2E,F). This could again reflect the  
301 involvement of additional glial subtypes or a less severe disruption of SJ formation than upon  
302 pan-glial TeNT-LC/Syb-RNAi expression. Notably, the impaired blood-brain barrier function  
303 in *nrxIV* mutants is partially compensated by the formation of intertwined cell-cell  
304 protrusions, resembling an evolutionary ancient barrier type found in primitive vertebrates or  
305 invertebrates (Babatz et al., 2018; Bundgaard and Abbott, 1992, 2008; Stork et al., 2008)  
306 potentially sufficient to suppress hyperexcitability. Alternatively or additionally, TeNT-  
307 LC/Syb-RNAi expression might impair other exocytotic processes (Hoogstraaten et al., 2020;  
308 Pascual et al., 2005; Perea and Araque, 2007; Schwarz et al., 2017). Recently, interference  
309 with WNT- and thus peptidergic-signaling specifically in SPGs was shown to affect  
310 postsynaptic glutamate receptors and synaptic transmission (Kerr et al., 2014). Indeed, Syb-  
311 RNAi expression in SPGs caused an accumulation of the peptidergic vesicle marker atrial  
312 natriuretic peptide (ANF (Rao et al., 2001); 11-fold increase in comparison to control; Fig.  
313 S2G,H) suggesting that peptidergic release from SPG is also mediated by Syb and might

314 contribute to nerve function. In conclusion, the disruption of nerves upon TeNT-LC  
 315 expression in SPGs appears to be due to a block of Syb-mediated SJ formation. However, the  
 316 prominent motoneuronal hyperactivity seen upon pan-glial expression is likely due to the  
 317 disruption of additional secretory processes, possibly in other cell types.

318

319 **Figure 3**

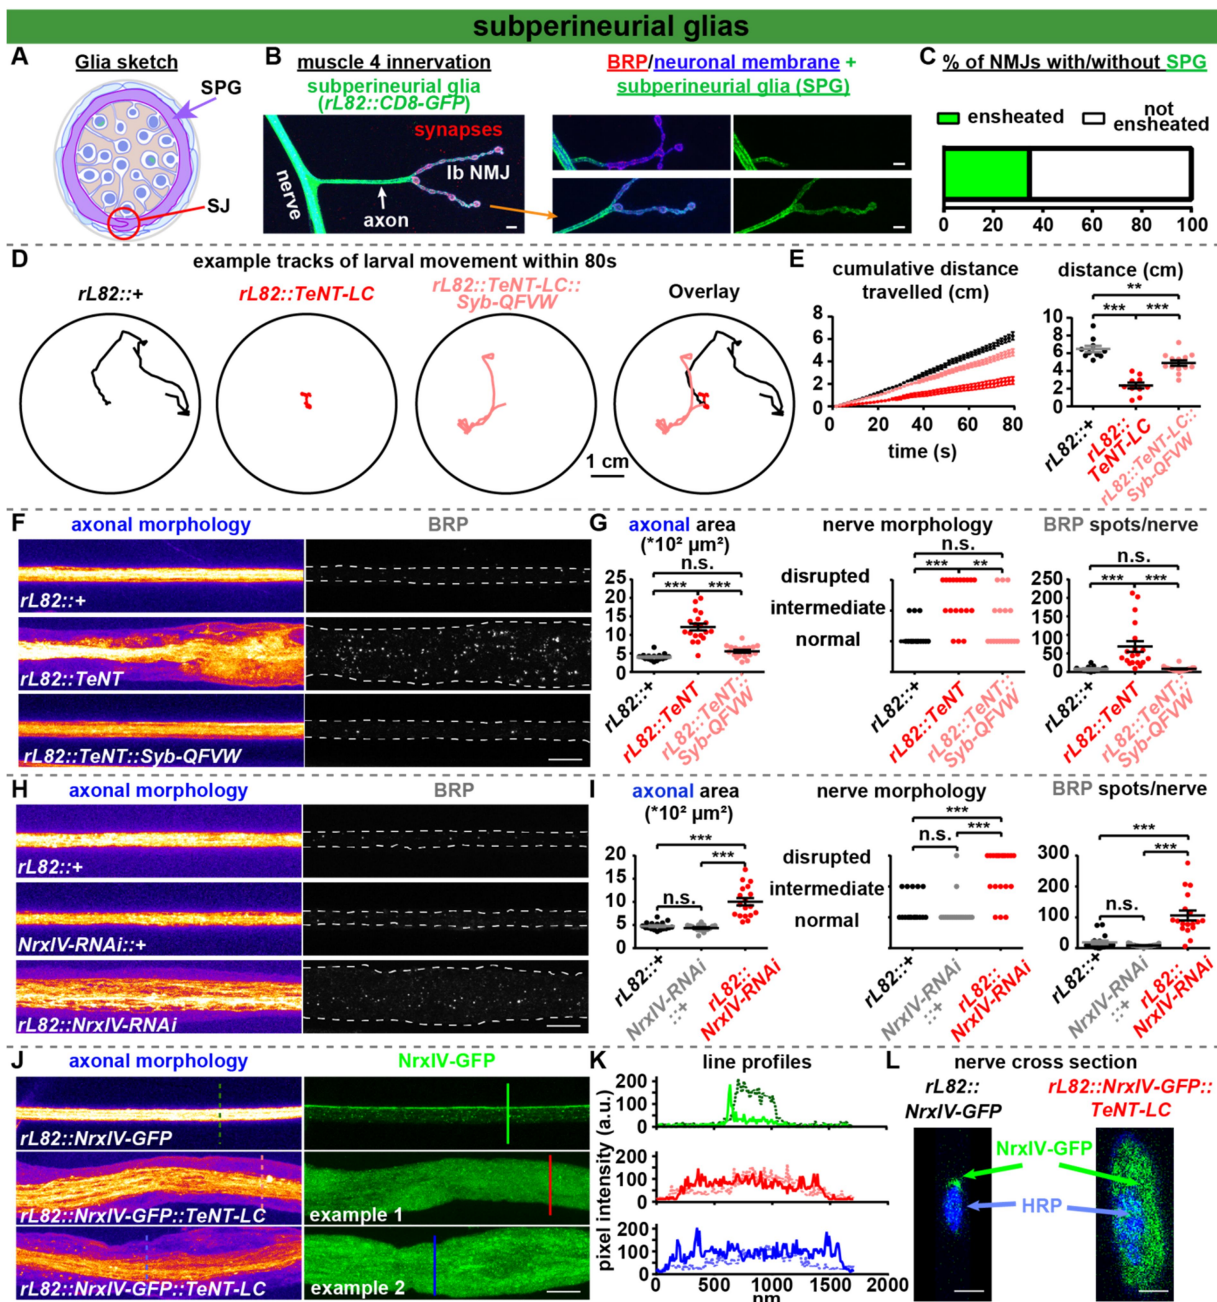

320

321 **Figure 3: TeNT-LC targets Syb in SPGs and impairs locomotion, disrupts peripheral nerves and**  
 322 **axonal transport, and blocks SJ formation.** A Cross section sketch of glial ensheathed motoneuron



323 axon highlighting SPGs (purple). Red circle highlights septate junction (SJ). **B,C** Examples of muscle  
324 4 NMJs of segments A2–A4 from 3<sup>rd</sup>-instar larvae expressing CD8-GFP in SPGs (left) with (left &  
325 bottom) and without (right top) SPG ensheathment of the NMJ. **C** Quantification of % of NMJs  
326 with/without SPG ensheathment. **D,E** Analysis of larval movement with example tracks over 80s (D),  
327 distances travelled over time (80s; E, left) and comparison of final distances travelled by larvae of the  
328 indicated genotypes (E, right). See also Videos 4, 5 and 7. **F,G** Nerves of segments A2–A4 (F) and  
329 quantification of axonal area, nerve morphology and BRP spots per nerve (G) from 3<sup>rd</sup>-instar larvae of  
330 *rL82::+* (black), *rL82::TeNT* (red) and *rL82::TeNT::Syb-QFVW* (light red) animals. **H,I** Same as in F-  
331 G but for *rL82::+* (black), *NrxIV-RNAi::+* (grey) and *rL82::NrxIV-RNAi* (red) animals. **J-L** Nerves of  
332 segments A2–A4 (J), vertical line profiles across nerve NrxIV-GFP signals (K; solid line GFP signal,  
333 dashed line HRP signal) and orthogonal nerve cross section (L) from 3<sup>rd</sup>-instar larvae of *rL82::NrxIV-*  
334 *GFP* and *rL82::NrxIV-GFP::TeNT* (two examples are shown). Lines in J indicate line profile positions  
335 shown in K. Scale bars: (B) 5  $\mu$ m; (F,H,J) 10  $\mu$ m; (L) 2.5  $\mu$ m. Statistics: parametric one-way analysis  
336 of variance (ANOVA) test, followed by Tukey's multiple comparison test except for (G, I: nerve  
337 morphology) where a non-parametric Kruskal-Wallis test was performed. \*\*\* $p \leq 0.001$ ; \*\* $p \leq 0.01$ ;  
338 \* $p \leq 0.05$ ; n.s. (not significant)  $p > 0.05$ . Dashed lines in (F,H: BRP) indicate nerve area. (B,C) 26  
339 NMJs, seven larvae; (D,E) *rL82::+*: ten larvae; *rL82::TeNT*: ten larvae; *rL82::TeNT::Syb-QFVW*: 13  
340 larvae; (F,G) *rL82::+*: 17 nerves, six larvae; *rL82::TeNT*: 19 nerves, five larvae; *rL82::TeNT::Syb-*  
341 *IsoA-QFVW*: 18 nerves, six larvae; (H,I) *rL82::+*: 17 nerves, six larvae; *NrxIV-RNAi::+*: 17 nerves,  
342 six larvae; *rL82::NrxIV-RNAi*: 18 nerves six larvae; (J-L) *rL82::NrxIV-GFP*: 18 nerves, six larvae;  
343 *rL82::NrxIV-GFP::TeNT*: 18 nerves, six larvae. All panels show mean  $\pm$  s.e.m. See also Figs. S1  
344 and 2.

345

346 TeNT-LC expression in WG impairs axonal transport likely by disrupting neural metabolic  
347 supply

348 SPG cells are not in direct contact with peripheral axons after early larval stages (Fig. 1B and  
349 (Stork et al., 2008)). We thus wondered whether the influence of SPGs on axonal transport  
350 might be indirect and rather via WGs whose functionality might also be impaired when nerve  
351 integration or signaling from the SPGs is disrupted. Although WGs directly contact  
352 axons/axon bundles, they rarely extend to the NMJ and we did not observed them to fully  
353 cover it (Fig. 4A-C). TeNT-LC expression in WGs using the WG-specific Nrv2-Gal4 driver  
354 line (although expression of Nrv2-Gal4 in cortex glia was also reported, which, however, are  
355 not present at peripheral nerves (Stork et al., 2008; Yildirim et al., 2019)) did not kill WG  
356 cells examined via simultaneous CD8-GFP expression (Fig. S3A,B). Unlike TeNT-LC  
357 expression in SPGs, TeNT-LC expression in WGs neither disrupted nerve integrity nor altered  
358 nerve area but caused a similarly strong accumulation of axonal BRP (Fig. 4D,E). Thus,  
359 axonal accumulation of synaptic BRP can be genetically uncoupled from the nerve  
360 defasciculation and hyperexcitability described above. Accordingly, the none-additive nature  
361 of the effects could imply that axonal BRP accumulations observed upon SPG-perturbation  
362 (Figs. 3F,G,H,I; Fig. S1A-C) may be caused by an indirect interference with WG function.

363 We hypothesized that impaired transport of synaptic BRP could be due to a shortage in  
364 metabolic energy in the neuron which is known to depend on glial cells (Edgar et al., 2009;  
365 Edgar et al., 2004; Griffiths et al., 1998; Nave, 2010). Here especially the Astrocyte-Neuron  
366 Lactate Shuttle (ANLS) Hypothesis (Pellerin and Magistretti, 1994) states that glial cells  
367 energetically support neurons by shuttling alanine and lactate via monocarboxylate  
368 transporters (MCTs) to fuel neuronal mitochondria in *Drosophila* and mice (Funfschilling et  
369 al., 2012; Lee et al., 2012; Liu et al., 2017; Machler et al., 2016; Pierre and Pellerin, 2005).  
370 We speculated that Syb was required to deliver MCTs to the plasma membrane and that  
371 TeNT-LC interfered with this. To test this hypothesis we co-expressed TeNT with an genomic

372 GFP-tagged version of MCT1 (Sarov et al., 2016) which led to a severe reduction in the  
373 number and size of MCT1 positive spots along the peripheral nerve (Fig. 4F,G). The  
374 *Drosophila* genome harbors 15 putative MCT transporters (Gonzalez-Gutierrez et al., 2019).  
375 To further evaluate our hypothesis by an independent means we interfered with MCT function  
376 in general by investigating whether WG knockdown of Basigin, a mandatory accessory  
377 protein for the functional integration of multiple MCTs (Halestrap and Wilson, 2012),  
378 induced similar effects. Indeed and reminiscent of the effects observed upon TeNT-LC  
379 expression in WGs, WG specific expression of Basigin-RNAi led to a strong accumulation of  
380 axonal BRP (6-fold increase, Fig. 4H,I, slightly stronger than WG TeNT-LC: ~3-fold (Fig.  
381 4D,E)) without any effect on axonal area, nerve integrity or neuronal lamella (Fig. 4H,I; Fig.  
382 S3C-E). The effect was specific to WG, as Basigin-knockdown in SPGs was without effect  
383 (Fig. S3F,G). Thus, our data are consistent with a crucial role of Syb in WGs to energetically  
384 supply axonal transport.

385 In conclusion we found unexpected and profound effects of TeNT-LC action on distinct glial  
386 cell types causing motoneuronal hyperexcitability, paralysis and death, and thus typical signs  
387 of TeNT-LC intoxication in mammals. Additionally we discovered disintegration of nerves,  
388 disruption of SJs, loss of nerve MCTs, glial accumulation of peptidergic vesicles and impaired  
389 axonal transport. We show that Syb, but not nSyb, is the relevant target and furthermore  
390 identify a differential requirement in two subpopulations of glial cells. While Syb appears to  
391 essentially contribute to SJ formation in SPG, it mediates neural metabolic support in WG.  
392 The observed phenotypes open new research avenues on how SNARE-mediated reactions in  
393 glial cells support neurons and other glial cells for proper nervous system function and  
394 whether disruptions of these contribute to diseases of peripheral motor control, including  
395 tetanus.

396 **Figure 4**

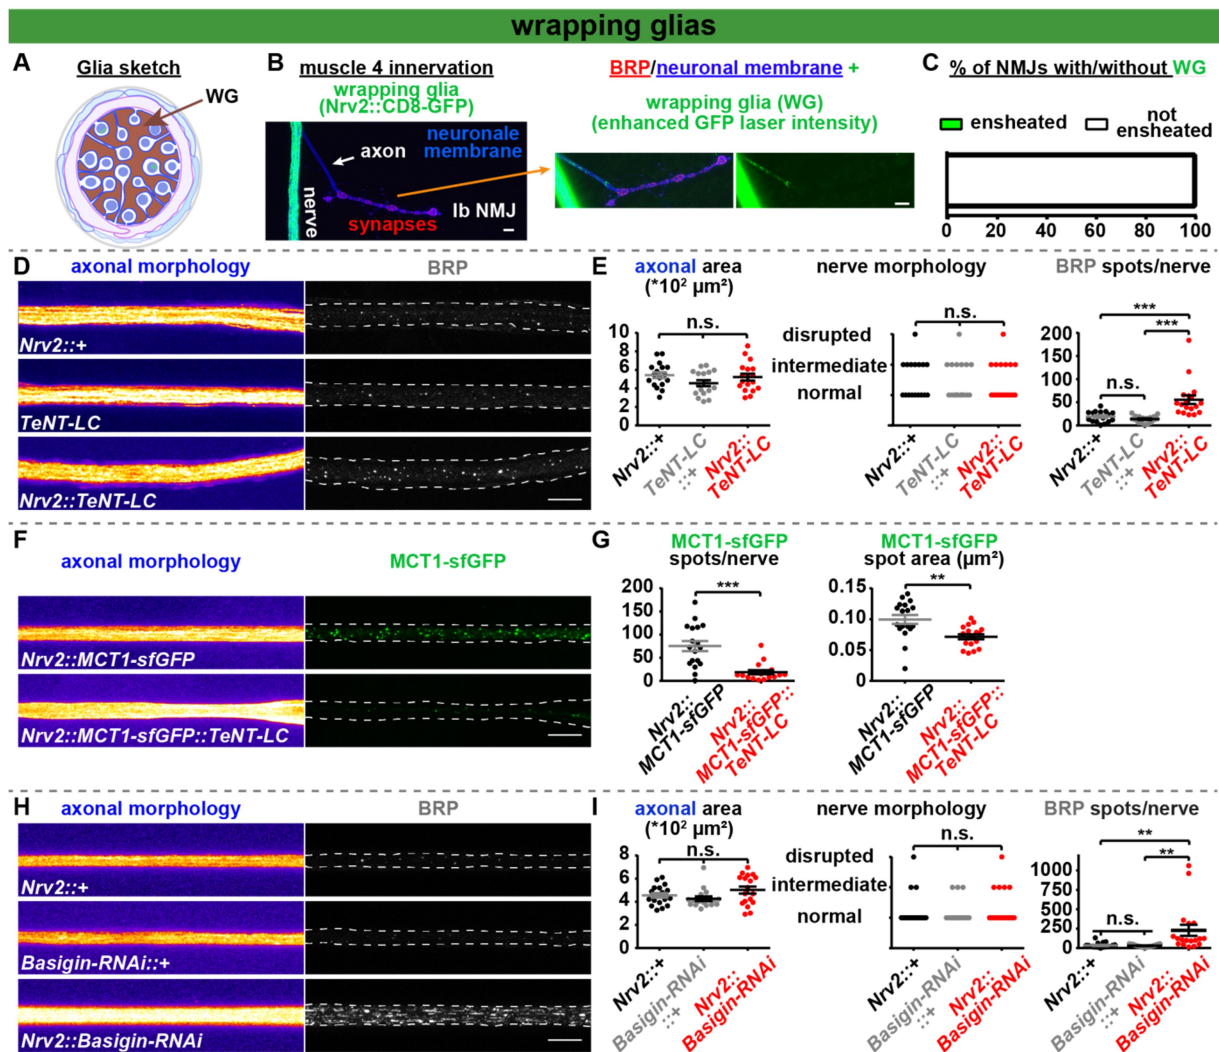

397

398 **Fig. 4: TeNT-LC action in WGs reduces nerve MCT1s numbers and causes axonal BRP**  
 399 **accumulation similarly to Basigin-knockdown.** **A** Cross section sketch of glial ensheathed  
 400 motoneuron axon highlighting WGs (brown). **B,C** Example of muscle 4 NMJs of segments A2–A4  
 401 from 3<sup>rd</sup>-instar larvae expressing CD8-GFP in WGs (left) with enhanced GFP laser intensity (right). **C**  
 402 Quantification of % of NMJs with/without WG ensheathment. **D,E** Nerves of segments A2–A4 (**D**) and  
 403 quantification of axonal area, nerve morphology and BRP spots per nerve (**E**) from 3<sup>rd</sup>-instar larvae of  
 404 *Nrv2::+* (black), *TeNT-LC::+* (grey) and *Nrv2::TeNT-LC* (red) animals. **F,G** Nerves of segments A2–  
 405 A4 (**F**) and quantification of MCT1-sfGFP spots per nerve and spot area (**G**) from 3<sup>rd</sup>-instar larvae of  
 406 *Nrv2::MCT1-sfGFP* (black) and *Nrv2::MCT1-sfGFP::TeNT-LC* (red) animals. **H,I** Same as in **D,E** but  
 407 for *Nrv2::+* (black), *Basigin-RNAi::+* (grey) and *Nrv2::Basigin-RNAi* (red) animals. Dashed line in **D**,  
 408 **F**, **H** indicates nerve area. Scale bars: (**B**) 5 μm; (**D,F,H**) 10 μm. Statistics: parametric one-way  
 409 analysis of variance (ANOVA) test, followed by Tukey’s multiple comparison test except for (**E**; **I**:  
 410 nerve morphology) where a non-parametric Kruskal-Wallis test and (**G**, MCT1-sf-GFP spots/nerve)  
 411 where a Mann-Whitney U test and (**G**, MCT1-sfGFP spot area) where a Student’s t test was

412 performed. \*\*\* $p \leq 0.001$ ; n.s. (not significant)  $p > 0.05$ . (B,C) 23 NMJs, six larvae; (D, E) *Nrv2::+*:  
413 17 nerves, six larvae; *TeNT::+*: 17 nerves, six larvae; *Nrv2::TeNT*: 18 nerves, six larvae; (F, G)  
414 *Nrv2::MCT1-sfGFP*: 18 nerves, six larvae; *Nrv2::MCT1-sfGFP::TeNT-LC*: 18 nerves, six larvae;  
415 (H,I) *Nrv2::+*: 17 nerves, six larvae; *Basigin-RNAi::+*: 17 nerves, five larvae; *Nrv2::Basigin-RNAi*: 18  
416 nerves, six larvae. All panels show mean  $\pm$  s.e.m. See also Fig. S3.

417

418 **Acknowledgements**

419 We thank C. Klämbt, Stephan J. Sigrist and Sean Sweeney for comments on the manuscript  
420 and C. Klämbt for Nr<sub>x</sub>IV-GFP and Nr<sub>x</sub>IV-RNAi fly lines. We thank Katherine Cuthill, Björn  
421 von Domarus and Christina Fefler for help with initial experiments, Björn von Domarus for  
422 help with confocal analysis and Kiana Nafarieh for help with video analysis. We thank  
423 Andreas T. Grasskamp for his help with the orthogonal view. This work was supported by  
424 grants from the Deutsche Forschungsgemeinschaft to A.M. Walter (project ID 261020751 –  
425 Emmy Noether programme and Project-ID 278001972 – TRR 186).

426

427 **Author contributions**

428 M.A.B and A.M.W conceived the project. M.A.B., K.P. and A.W.M. performed fly  
429 husbandry and maintenance. M.A.B. performed larvae behavior experiments and A.W.M.  
430 analyzed the data. M.A.B. and K.P. performed confocal experiments and analyzed the data.  
431 M.A.B., M.B. and A.W.M. performed electrophysiological experiments and M.A.B. and  
432 A.W.M. analyzed the data. M.A.B. and A.M.W wrote the paper with input from A.W.M..

433

434 **Competing interest**

435 All authors declare no conflicting financial and non-financial interest.

436

## 437 **Methods**

### 438 **Contact for Reagent and Resource Sharing**

439 Further information and requests for resources and reagents should be directed to and will be  
440 fulfilled by the Lead Contact, Alexander M. Walter (awalter@fmp-berlin.de).

441

### 442 **Experimental Model and Subject Details**

#### 443 **Fly husbandry, stocks and handling**

444 Fly strains were reared under standard laboratory conditions (Sigrist et al., 2003) and raised at  
445 25°C on semi-defined medium (Bloomington recipe). For RNAi experiments larvae were kept  
446 at 29°C. For experiments both male and female 3<sup>rd</sup> instar larvae were used. The following  
447 genotypes were used: Figure 1 and Videos 1-3: Wild-type: +/+ (*w<sup>1118</sup>*). Repo::+: *Repo-*  
448 *Gal4/+*; TeNT-LC::+: *UAS-TeNT-LC/+*; Repo::TeNT-LC: *Repo-Gal4/UAS-TeNT-LC*. Figure  
449 2: Repo::+: *Repo-Gal4/+*; nSyb-RNAi::+: *UAS-nSyb-RNAi/+*; Repo::nSyb-RNAi: *UAS-nSyb-*  
450 *RNAi/+;Repo-Gal4/+*; Syb-RNAi: *UAS-Syb-RNAi/+*; Repo::Syb-RNAi: *UAS-Syb-*  
451 *RNAi/+;Repo-Gal4/+*. Figure 3, Videos 4, 5 and 7: rL82::CD8-GFP: *rL82-Gal4/+; UAS-*  
452 *mCD8-GFP/+*; rL82::+: *rl82-Gal4/+*; rL82::TeNT-LC: *rL82-Gal4/+;UAS-TeNT-LC/+*;  
453 rL82::TeNT-LC::Syb-GFVW: *rL82-Gal4/+;UAS-TeNT-LC/UAS-Syb-IsoA-QFVW*;  
454 rL82::NrxIV-GFP: *rl82-Gal4/+; NrxIV::GFP<sup>454</sup>/+*; rL82::NrxIV-GFP::TeNT-LC: *rl82-*  
455 *Gal4/+; NrxIV::GFP<sup>454</sup>/UAS-TeNT-LC*; NrxIV-RNAi::+: *UAS-NrxIV-RNAi/+*; rL82::NrxIV-  
456 RNAi: *rL82-Gal4/UAS-NrxIV-RNAi*. Video 6: rL82::TeNT-LC: *rL82-Gal4/(Wim); UAS-*  
457 *TeNT-LC/+*; Control: *w<sup>1118</sup>*. Figure 4: Nrv2::CD8-GFP: *Nrv2-Gal4/+; UAS-mCD8-GFP/+*;  
458 Nrv2::+: *Nrv2-Gal4/+*; TeNT-LC::+: *UAS-TeNT-LC/+*; Nrv2::TeNT-LC: *Nrv2-Gal4/+;UAS-*  
459 *TeNT-LC/+*; Nrv2::MCT1-sfGFP: *Nrv2-Gal4/+;MCT1-sfGFP/+*; Nrv2::MCT1-  
460 sfGFP::TeNT: *Nrv2-Gal4/+;MCT1-sfGFP/UAS-TeNT-LC*; Basigin-RNAi::+: *UAS-Basigin-*  
461 *RNAi/+*; Nrv2::Basigin-RNAi: *Nrv2-Gal4/+;UAS-Basigin-RNAi/+*. Fig. S1: rL82::+: *rl82-*  
462 *Gal4/+*; Syb-RNAi::+: *UAS-Syb-RNAi/+*; rL82::Syb-RNAi: *rL82-Gal4/UAS-Syb-RNAi*;

463 TeNT-LC::+: *UAS-TeNT-LC/+*; rL82::TeNT-LC: *rL82-Gal4/+;UAS-TeNT-LC/+*. Fig. S2:  
464 rL82::CD8-GFP: *rL82-Gal4/+; UAS-mCD8-GFP/+*; rL82::CD8-GFP::TeNT-LC: *rL82-*  
465 *Gal4/+; UAS-mCD8-GFP/UAS-TeNT-LC*; rL82::CD8-GFP::Syb-RNAi: *rL82-Gal4/Syb-*  
466 *RNAi; UAS-mCD8-GFP/+*; rL82::+: *rl82-Gal4/+*; NrXIV-RNAi::+: *UAS-NrxIV-RNAi/+*;  
467 rL82::NrXIV-RNAi: *rL82-Gal4/UAS-NrxIV-RNAi*; rL82::ANF-EMD: *rL82-Gal4/+; UAS-*  
468 *ANF-EMD/+*; rL82::ANF-EMD::Syb-RNAi: *rL82-Gal4/Syb-RNAi; UAS-ANF-EMD/+*. Fig.  
469 S3: Nrv2::CD8-GFP: *Nrv2-Gal4/+; UAS-mCD8-GFP/+*; Nrv2::CD8-GFP::TeNT-LC: *Nrv2-*  
470 *Gal4/+; UAS-mCD8-GFP/UAS-TeNT-LC*; Nrv2::+: *Nrv2-Gal4/+*; Basigin-RNAi::+: *UAS-*  
471 *Basigin-RNAi/+*; Nrv2::Basigin-RNAi: *Nrv2-Gal4/+;UAS-Basigin-RNAi/+*; rL82::+: *rL82-*  
472 *Gal4/+*; Basigin-RNAi::+: *UAS-Basigin-RNAi/+*; rL82::Basigin-RNAi: *rL82-Gal4/+;UAS-*  
473 *Basigin-RNAi/+*.

474 Stocks were obtained from: Repo-Gal4 (Sepp et al., 2001); UAS-TeNT-LC (Sweeney et al.,  
475 1995); UAS-nSyb-RNAi (VDRC #104531/#49201); UAS-Syb-RNAi (VDRC #102922);  
476 rL82-Gal4 (Sepp and Auld, 1999); Nrv2-Gal4 (Sun et al., 1999); NrXIV::GFP<sup>454</sup> (Edenfeld et  
477 al., 2006); UAS-mCD8-GFP (Lee and Luo, 1999); MCT1-sf-GFP ((Sarov et al., 2016);  
478 VDRC #318191); UAS-Basigin-RNAi (VDRC #43307); UAS-NrxIV-RNAi (VDRC #8353);  
479 UAS-ANF-EMD (Rao et al., 2001).

480

## 481 **Method details**

### 482 **Generation of UAS-Syb-IsoA-QFVW**

483 UAS-Syb-IsoA-QFVW was generated by WellGenetics Inc. (Taipei, Taiwan). To generate  
484 cDNA encoding UAS-Syb-IsoA-QFVW, the sequence was amplified from cDNA clone  
485 SD05285 (obtained from DGRC). Point mutations were generated using the following  
486 primers:

487 Syn-RA-5'-QFVW:

488 F: gatctgCGGCCGCGGCTCGAGATGGAGAACAACGAAGCCCC



489 R: GCTGCTCCCACACGGATGCTCCCTGCTCCAG

490 Syn-RA-3'-QFVW:

491 F: AGCATCCGTGTGGGAGCAGCAGGCCGGCAA

492 R: tcctctagaggtaccctcgagTTAGTGCGGCGGTGCTTG

493 PCR fragments were then cloned into into pUAST-attB vector using XhoI restriction sites.

494 Generation of transgenic DNA micro-injection into embryos was performed by WellGenetics

495 Inc., Taiwan using the PhiC31 integration system. The construct was inserted into strain 9725

496 (Bloomington, IN, USA): y[1] w[1118]; PBac {y[+]-attP-9A}VK00005.

497

### 498 **Immunostaining**

499 Third-instar w1118 larvae were put on a dissection plate with both ends fixed by fine pins.

500 Larvae were then covered by 50  $\mu$ l of ice-cold hemolymph-like saline solution (HL3, pH

501 adjusted to 7.2 (Stewart et al., 1994): 70 mM NaCl, 5 mM KCl, 20 mM MgCl<sub>2</sub>, 10 mM

502 NaHCO<sub>3</sub>, 5 mM Trehalose, 115 mM D-Saccharose, 5 mM HEPES). Using dissection scissors

503 a small cut at the dorsal, posterior midline of the larva was made from where on the larvae

504 was cut completely open along the dorsal midline until its anterior end. Subsequently, the

505 epidermis was pinned down and slightly stretched and the internal organs and tissues

506 removed. Care was taken not to harm the ventral nerve cord and the peripheral nerves. The

507 dissected samples were washed 3x with ice-cold HL3 and then fixed for 5 minutes with ice-

508 cold methanol. After fixation, samples were briefly rinsed with HL3 and then blocked for 1h

509 in 5% native goat serum (NGS; Sigma-Aldrich, MO, USA, S2007) diluted in phosphate

510 buffered saline (Carl Roth, Germany) with 0.05% Triton-X100 (PBT). Subsequently dissected

511 samples were incubated with primary antibodies (mouse Nc82 = anti-BRP<sup>C-term</sup> (1:100,

512 Developmental Studies Hybridoma Bank, University of Iowa, Iowa City, IA, USA; AB

513 Registry ID: AB\_2314865); rabbit BRP<sup>Last200</sup> (1:1000; (Ullrich et al., 2015)); rabbit GluRIID

514 (1:500; (Qin et al., 2005)); mouse GFP 3E6 (1:500, Thermo Fisher Scientific Inc., MA, USA,

515 A-11120; AB Registry ID: AB\_221568)) diluted in 5% NGS in PBT overnight. Afterwards  
516 samples were washed 5x for 30 min with PBT and then incubated for 4h with fluorescence-  
517 labeled secondary antibodies (goat anti-HRP-647 (1:500, Jackson ImmunoResearch 123-605-  
518 021, PA, USA); goat anti-rabbit-Cy3 (1:500, Jackson ImmunoResearch 111-165-144, PA,  
519 USA); goat anti-mouse-Cy3 (1:500, Jackson ImmunoResearch 115-165-146, PA, USA); anti-  
520 Phalloidin-Atto565 (1:1700; Sigma-Aldrich, MO, USA, 94072); goat anti-mouse Alexa-  
521 Fluor-488 (1:500, Life Technologies A11001, CA, USA)) diluted in 5% NGS in PBT.  
522 Samples were then washed overnight in PBT and subsequently mounted in vectashield  
523 (Vector labs, CA, USA) on microscope slides (Carl Roth, Germany; H868) and sealed with  
524 coverslips (Carl Roth, Germany, H 875). Antibodies obtained from the Developmental  
525 Studies Hybridoma Bank were created by the NICHD of the NIH and maintained at The  
526 University of Iowa, Department of Biology, Iowa City, IA 52242.

527

### 528 **Image Acquisition, Processing, and Analysis**

529 Confocal microscopy was performed with a Leica SP8 microscope (Leica Microsystems,  
530 Germany). Images were acquired at room temperature. Confocal imaging was done using a  
531 63×1.4 NA oil immersion objective with a zoom of 1.8 and z-step size of 0.25  $\mu\text{m}$ . All  
532 confocal images were acquired using the LAS X software (Leica Microsystems, Germany).  
533 Images from fixed samples were taken from nerve bundles exiting the ventral nerve cord of  
534 segments A2-A4 (see Figure 1A for depicted ROI). Confocal stacks were processed with  
535 ImageJ software (<http://rsbweb.nih.gov/ij/>). Quantifications of axonal BRP spot numbers were  
536 performed following an adjusted manual (Andlauer and Sigrist, 2012), briefly as follows. The  
537 signal of a HRP-647 antibody was used as template for a mask, restricting the quantified area  
538 to the shape of the nerve. The original confocal stacks were converted to maximal projections  
539 and a mask of the axonal BRP spots was created by applying a threshold to remove irrelevant  
540 lower intensity pixels. The threshold was adjusted manually and individually to every image

541 to detect all axonal BRP spots. The segmentation of single spots was done semi-automatically  
542 via the command “Find Maxima” embedded in the ImageJ software and by hand with the  
543 pencil tool and a line thickness of 1 pixel. To remove high frequency noise a Gaussian blur  
544 filter (0.5 pixel Sigma radius) was applied. The processed picture was then transformed into a  
545 binary mask using the same lower threshold value as in the first step. This binary mask was  
546 then projected onto the original unmodified image using the “min” operation from the ImageJ  
547 image calculator. BRP spot numbers and sizes were determined using the “Analyze particles”  
548 function (particle size > 2 pixels) embedded into ImageJ. Line profiles were measured using  
549 the plot profile function of ImageJ. To measure the axonal (HRP) or lamellar (GluRIID) area,  
550 the signal of the HRP-647 or the GluRIID antibody was used as template for a binary mask.  
551 The area was then quantified using the “wand tool” to select the area and “measure” function  
552 embedded into ImageJ to quantify the area. For orthogonal sections, confocal RGB stacks  
553 were processed using MATLAB R2016a as follows: first, the whole stack containing the three  
554 channels (BRP, GluRIID, HRP) was loaded using the command "imread" in a loop iterating  
555 through the first to last image of the stack. Then, the three channels were separated into three  
556 stacks for the following permutation operation. Using the command "permute", the 2<sup>nd</sup> and 3<sup>rd</sup>  
557 dimension were switched separately in each stack. Lastly, each of the three permuted stacks  
558 was written to a file using the command "imwrite" in a loop iterating through all images of the  
559 stack, resulting in three .tif-files (each for one channel) showing the orthogonal view of the  
560 imaged nerve. The respective code is available upon request. Orthogonal views of each nerve  
561 (BRP, GluRIID, HRP) were then merged using ImageJ.

562 To evaluate nerve disruption, nerves were manually categorized by their degree of  
563 disintegration. Category 1: normal morphology: long, thin and smooth nerves (see control  
564 images in Fig. 1E for example); category 2: intermediate: slight morphological alterations like  
565 single defasciculating axons, slightly increased nerve area; category 3: disrupted: complete

566 disintegration of the nerve integrity, defasciculation of whole parts of the nerve, large  
567 expansion of the nerve area (see *Repo::Syb-RNAi* image in Fig. 2E for example).

568 Images for figures were processed with ImageJ software to enhance brightness using the  
569 brightness/contrast function.

570

### 571 **Video of larval and adult fly movement**

572 Larval behavior was investigated by placing 3<sup>rd</sup> instar larvae of the correct genotype in the  
573 center of a petri dish (diameter: 5.4 cm) that contained two ml of water to avoid larvae  
574 attachment to the plastic dish or larvae crawling up the wall of the dish. Videos were recorded  
575 with a Samsung Galaxy A50 for ca. 90s using the imbedded video function. A ruler was  
576 placed next to the dish to allow measuring the walking distance. For analysis, videos were  
577 converted to AVI format and compressed using FFmpegTool software (v4.3,  
578 [ffmpeg.zeranoe.com](http://ffmpeg.zeranoe.com)). Videos were analyzed by a different person than the one recording the  
579 video blinded for genotype. Using Fiji software (ImageJ 1.51n) a substack was created for  
580 each video, selecting every 50<sup>th</sup> frame. This reduced the framerate from 30 Hz to 0.6 Hz.  
581 Using the manual tracking plugin of Fiji, the head of the larva was selected and tracked in  
582 each frame of the substack for 80 s (Fig. 3D,E; Videos 4,5,7) or 85 s (Fig. 1C,D; Videos 1-3)  
583 after it was added to the dish. Final larval movement tracks were saved as ROIs and the total  
584 distance travelled by each larva calculated.

585 For adult behavior assessment (Video 6) two *rL82::TeNT-LC* flies and one control (w1118)  
586 were put in an empty food vial and illuminated with a ZLED CLS 600 (Zett Optics, Gemany)  
587 light source. To induce fly movement, the vial was occasionally banged on the table.

588

### 589 **Protein sequence alignment**

590 Sequences of Syb-PA (ID: FBpp0087450) and nSyb-PA (ID: FBpp0072697) were obtained  
591 from flybase ([flybase.org](http://flybase.org), version FB2020\_02; date: May 28 2020). Alignment was

592 performed using Clustal Omega ((Sievers et al., 2011);  
593 <https://www.ebi.ac.uk/Tools/msa/clustalo/>; version 1.2.4). Gonnet PAM250 matrix was used  
594 to compare sequence substitutions: \* identical aa, : score >0.5, . score <0.5, “gap” score  
595 below 0.

596

## 597 **Electrophysiology**

598 Third instar larvae were individually placed on Sylgard (184, Dow Corning, Midland, MI,  
599 USA) and pinned at the head and the tail. 40  $\mu$ l modified hemolymph-like solution (HL3;  
600 (Stewart et al., 1994) composition (in mM): NaCl 70, KCl 5, MgCl<sub>2</sub> 10, NaHCO<sub>3</sub> 10,  
601 trehalose 5, sucrose 115, HEPES 5, CaCl<sub>2</sub> 0, pH adjusted to 7.2) was pipetted onto the larva at  
602 room temperature (~22°C). A small incision was made with a sharp scissors in the dorsal  
603 cuticle near the tail pin. Starting from this posterior incision, a cut was made along the length  
604 of the larva extending beyond the head pin. The cuticle was pinned down twice on either side.  
605 The intestines and trachea were cut at the posterior and held firmly with a forceps as the  
606 remaining connections to the body were cut before being fully removed, taking care not to  
607 pull on the preparation. The brain was held slightly raised above the preparation and the  
608 segmental nerves cut without touching the underlying muscle, before finally removing the  
609 brain. The Sylgard block and completed larval preparation was placed in the recording  
610 chamber which was filled with 2 ml HL3 (plus 0.4 mM CaCl<sub>2</sub>, 10 mM MgCl<sub>2</sub>). Recordings  
611 were performed at room temperature in current clamp mode at muscle 6 in segments A2/A3  
612 as previously described (Zhang and Stewart, 2010) using an Axon Digidata 1550A digitizer,  
613 Axoclamp 900A amplifier with HS-9A x0.1 headstage (Molecular Devices, CA, USA) and on  
614 a BX51WI Olympus microscope with a 40X LUMPlanFL/IR water immersion objective.  
615 Sharp intracellular recording electrodes were made using a Flaming Brown Model P-97  
616 micropipette puller (Sutter Instrument, CA, USA) with a resistance of 20-35 M $\Omega$  and back-  
617 filled with 3 M KCl. Cells were only considered with a membrane potential of less than -

618 60 mV and membrane resistances greater than 3 M $\Omega$ . All recordings were acquired using  
619 Clampex software (v10.5), filtered with a 5 kHz low-pass filter and sampled at 10-50 kHz.  
620 eEPSPs were recorded by stimulating the appropriate nerve at 10 s intervals five times (8 V,  
621 300  $\mu$ s pulse) using an ISO-STIM 01D stimulator (NPI Electronic, Germany). Stimulating  
622 suction electrodes were pulled on a DMZ-Universal Puller (Zeitz-Instruments GmbH,  
623 Germany) and fire polished using a CPM-2 microforge (ALA Scientific, NY, USA). A  
624 maximum of two cells were recorded per animal.

625 Analysis was performed with Clampfit 10.5 and Graphpad Prism 6 software. mEPSPs  
626 were further filtered with a 500 Hz Gaussian low-pass filter. A single mEPSP template was  
627 generated for each 1-minute cell recording and used to identify individual mEPSPs,  
628 calculating the mean mEPSP amplitude per cell. To calculate eEPSP amplitudes, an average  
629 trace was generated from the five traces and the amplitude of the first response peak in the  
630 resulting average trace calculated. To determine hyperactivity or aberrant cell responses, a  
631 threshold was set at 8 mV. The number of response peaks above the 8 mV threshold for each  
632 cell was determined and normalized to the number of stimuli (five). Aberrant activity in a cell  
633 was defined as multiple response peaks above the 8 mV threshold following each individual  
634 stimulus, or any response to an individual stimulus below the 8 mV threshold including  
635 failures.

636

### 637 **Quantification and Statistical Analysis**

638 Data were analyzed using Prism (GraphPad Software, CA, USA). Per default two-sided  
639 Student's t test was performed to compare the means of two groups unless the data were non-  
640 normally distributed (as assessed D'Agostino-Pearson omnibus normality test) in which case  
641 they were compared by a two-tailed Mann-Whitney U test. For comparison of more than two  
642 groups, one-way analysis of variance (ANOVA) tests were used, followed by a Tukey's

643 multiple comparison test. In the case of ordinal data (nerve morphology) a Kruskal-Wallis test  
644 was used. Means are annotated  $\pm$  s.e.m.. Asterisks are used to denote significance: \*,  $p < 0.05$ ;  
645 \*\*,  $p < 0.01$ ; \*\*\*,  $p < 0.001$ ; n.s. (not significant),  $p > 0.05$ .

646

#### 647 **Data and Software Availability**

648 The data that support the findings of this study, additional information and requests for  
649 resources and reagents as well as Matlab or ImageJ codes used in this study are available from  
650 Alexander M. Walter ([awalter@fmp-berlin.de](mailto:awalter@fmp-berlin.de)) upon request.

651 **Video titles and legends**

652 **Videos 1-3: Pan-glial TeNT-LC expression severely impairs larval movement.** Video of  
653 larval movement over 85s for *Repo::+* (Video 1), *TeNT::+* (Video 2) and *Repo::TeNT* (Video  
654 3). See also Figure 1C,D for analysis.

655

656 **Videos 4, 5 and 7: TeNT-insensitive Syb-variant recovers larval movement in SPG**  
657 **TeNT-LC expressing animals.** Video of larval movement over 80s for *rL82::+* (Video 4),  
658 *rL82::TeNT* (Video 5) and *rl82::TeNT::Syb-QFVW* (Video 7). See also Fig. 3D,E for  
659 analysis.

660

661 **Video 6: TeNT-LC expression in SPGs severely paralyzes adult flies.** Video of two  
662 *rL82::TeNT-LC-LC* flies and one control. *rL82::TeNT-LC-LC* flies are severely paralyzed  
663 (uncoordinated or no movement; inability to turn around when laying on their backs; no  
664 reaction to banging) while the control fly rapidly moves upwards after bang-shock.

665



## 666 References

- 667 Andlauer, T.F., and Sigrist, S.J. (2012). Quantitative analysis of *Drosophila* larval  
668 neuromuscular junction morphology. *Cold Spring Harb Protoc* 2012, 490-493.
- 669 Auld, V.J., Fetter, R.D., Broadie, K., and Goodman, C.S. (1995). Gliotactin, a novel  
670 transmembrane protein on peripheral glia, is required to form the blood-nerve barrier  
671 in *Drosophila*. *Cell* 81, 757-767.
- 672 Babatz, F., Naffin, E., and Klambt, C. (2018). The *Drosophila* Blood-Brain Barrier Adapts to  
673 Cell Growth by Unfolding of Pre-existing Septate Junctions. *Dev Cell* 47, 697-710  
674 e693.
- 675 Banerjee, S., Bainton, R.J., Mayer, N., Beckstead, R., and Bhat, M.A. (2008). Septate  
676 junctions are required for ommatidial integrity and blood-eye barrier function in  
677 *Drosophila*. *Dev Biol* 317, 585-599.
- 678 Baumgartner, S., Littleton, J.T., Broadie, K., Bhat, M.A., Harbecke, R., Lengyel, J.A.,  
679 Chiquet-Ehrismann, R., Prokop, A., and Bellen, H.J. (1996). A *Drosophila* neurexin is  
680 required for septate junction and blood-nerve barrier formation and function. *Cell* 87,  
681 1059-1068.
- 682 Bittern, J., Pogodalla, N., Ohm, H., Bruser, L., Kottmeier, R., Schirmeier, S., and Klambt, C.  
683 (2020). Neuron-glia interaction in the *Drosophila* nervous system. *Dev Neurobiol*.
- 684 Bleck, T.P. (1989). Clinical aspects of tetanus. In *Botulinum neurotoxin and tetanus toxin*, S.  
685 LL, ed. (San Diego: Academic), pp. 379–398.
- 686 Blum, F.C., Chen, C., Kroken, A.R., and Barbieri, J.T. (2012). Tetanus toxin and botulinum  
687 toxin utilize unique mechanisms to enter neurons of the central nervous system.  
688 *Infect Immun* 80, 1662-1669.
- 689 Blum, F.C., Tepp, W.H., Johnson, E.A., and Barbieri, J.T. (2014). Multiple domains of  
690 tetanus toxin direct entry into primary neurons. *Traffic* 15, 1057-1065.
- 691 Bomba-Warczak, E., Vevea, J.D., Brittain, J.M., Figueroa-Bernier, A., Tepp, W.H., Johnson,  
692 E.A., Yeh, F.L., and Chapman, E.R. (2016). Interneuronal Transfer and Distal Action  
693 of Tetanus Toxin and Botulinum Neurotoxins A and D in Central Neurons. *Cell Rep*  
694 16, 1974-1987.
- 695 Brink, D., Gilbert, M., and Auld, V. (2009). Visualizing the live *Drosophila* glial-  
696 neuromuscular junction with fluorescent dyes. *J Vis Exp*.
- 697 Bruns, D., Engers, S., Yang, C., Ossig, R., Jeromin, A., and Jahn, R. (1997). Inhibition of  
698 transmitter release correlates with the proteolytic activity of tetanus toxin and  
699 botulinus toxin A in individual cultured synapses of *Hirudo medicinalis*. *J Neurosci*  
700 17, 1898-1910.
- 701 Bruns, D., and Jahn, R. (2002). Molecular determinants of exocytosis. *Pflugers Arch* 443,  
702 333-338.
- 703 Bundgaard, M., and Abbott, N.J. (1992). Fine structure of the blood-brain interface in the  
704 cuttlefish *Sepia officinalis* (Mollusca, Cephalopoda). *J Neurocytol* 21, 260-275.
- 705 Bundgaard, M., and Abbott, N.J. (2008). All vertebrates started out with a glial blood-brain  
706 barrier 4-500 million years ago. *Glia* 56, 699-708.
- 707 Carle, S., Pirazzini, M., Rossetto, O., Barth, H., and Montecucco, C. (2017). High  
708 Conservation of Tetanus and Botulinum Neurotoxins Cleavage Sites on Human  
709 SNARE Proteins Suggests That These Pathogens Exerted Little or No Evolutionary  
710 Pressure on Humans. *Toxins (Basel)* 9.
- 711 Carlsen, E.M., and Perrier, J.F. (2014). Purines released from astrocytes inhibit excitatory  
712 synaptic transmission in the ventral horn of the spinal cord. *Front Neural Circuits* 8,  
713 60.
- 714 Carlson, S.D., Juang, J.L., Hilgers, S.L., and Garment, M.B. (2000). Blood barriers of the  
715 insect. *Annu Rev Entomol* 45, 151-174.

- 716 Chin, A.C., Burgess, R.W., Wong, B.R., Schwarz, T.L., and Scheller, R.H. (1993).  
717 Differential expression of transcripts from syb, a *Drosophila melanogaster* gene  
718 encoding VAMP (synaptobrevin) that is abundant in non-neuronal cells. *Gene* 131,  
719 175-181.
- 720 Christensen, R.K., Delgado-Lezama, R., Russo, R.E., Lind, B.L., Alcocer, E.L., Rath, M.F.,  
721 Fabbiani, G., Schmitt, N., Lauritzen, M., Petersen, A.V., *et al.* (2018). Spinal dorsal  
722 horn astrocytes release GABA in response to synaptic activation. *J Physiol* 596, 4983-  
723 4994.
- 724 Christensen, R.K., Petersen, A.V., and Perrier, J.F. (2013). How do glial cells contribute to  
725 motor control? *Curr Pharm Des* 19, 4385-4399.
- 726 Deinhardt, K., Berninghausen, O., Willison, H.J., Hopkins, C.R., and Schiavo, G. (2006).  
727 Tetanus toxin is internalized by a sequential clathrin-dependent mechanism initiated  
728 within lipid microdomains and independent of epsin1. *J Cell Biol* 174, 459-471.
- 729 Deinhardt, K., and Schiavo, G. (2005). Endocytosis and retrograde axonal traffic in motor  
730 neurons. *Biochem Soc Symp*, 139-150.
- 731 Deitcher, D.L., Ueda, A., Stewart, B.A., Burgess, R.W., Kidokoro, Y., and Schwarz, T.L.  
732 (1998). Distinct requirements for evoked and spontaneous release of neurotransmitter  
733 are revealed by mutations in the *Drosophila* gene neuronal-synaptobrevin. *J Neurosci*  
734 18, 2028-2039.
- 735 DiAntonio, A., Burgess, R.W., Chin, A.C., Deitcher, D.L., Scheller, R.H., and Schwarz, T.L.  
736 (1993). Identification and characterization of *Drosophila* genes for synaptic vesicle  
737 proteins. *J Neurosci* 13, 4924-4935.
- 738 Edenfeld, G., Volohonsky, G., Krukkert, K., Naffin, E., Lammel, U., Grimm, A., Engelen, D.,  
739 Reuveny, A., Volk, T., and Klambt, C. (2006). The splicing factor crooked neck  
740 associates with the RNA-binding protein HOW to control glial cell maturation in  
741 *Drosophila*. *Neuron* 52, 969-980.
- 742 Edgar, J.M., McLaughlin, M., Werner, H.B., McCulloch, M.C., Barrie, J.A., Brown, A.,  
743 Faichney, A.B., Snaidero, N., Nave, K.A., and Griffiths, I.R. (2009). Early  
744 ultrastructural defects of axons and axon-glia junctions in mice lacking expression of  
745 *Cnp1*. *Glia* 57, 1815-1824.
- 746 Edgar, J.M., McLaughlin, M., Yool, D., Zhang, S.C., Fowler, J.H., Montague, P., Barrie, J.A.,  
747 McCulloch, M.C., Duncan, I.D., Garbern, J., *et al.* (2004). Oligodendroglial  
748 modulation of fast axonal transport in a mouse model of hereditary spastic paraplegia.  
749 *J Cell Biol* 166, 121-131.
- 750 Elferink, L.A., Trimble, W.S., and Scheller, R.H. (1989). Two vesicle-associated membrane  
751 protein genes are differentially expressed in the rat central nervous system. *J Biol*  
752 *Chem* 264, 11061-11064.
- 753 Erdmann, G., Wiegand, H., and Wellhoner, H.H. (1975). Intraaxonal and extraaxonal  
754 transport of 125I-tetanus toxin in early local tetanus. *Naunyn Schmiedebergs Arch*  
755 *Pharmacol* 290, 357-373.
- 756 Fields, R.D. (2015). A new mechanism of nervous system plasticity: activity-dependent  
757 myelination. *Nat Rev Neurosci* 16, 756-767.
- 758 Fuentes-Medel, Y., Logan, M.A., Ashley, J., Ataman, B., Budnik, V., and Freeman, M.R.  
759 (2009). Glia and muscle sculpt neuromuscular arbors by engulfing destabilized  
760 synaptic boutons and shed presynaptic debris. *PLoS Biol* 7, e1000184.
- 761 Funfschilling, U., Supplie, L.M., Mahad, D., Boretius, S., Saab, A.S., Edgar, J., Brinkmann,  
762 B.G., Kassmann, C.M., Tzvetanova, I.D., Mobius, W., *et al.* (2012). Glycolytic  
763 oligodendrocytes maintain myelin and long-term axonal integrity. *Nature* 485, 517-  
764 521.

- 765 Gonzalez-Gutierrez, A., Ibacache, A., Esparza, A., Barros, L.F., and Sierralta, J. (2019).  
766 Monocarboxylate Transport in *Drosophila* Larval Brain during Low and  
767 High Neuronal Activity. *bioRxiv*, 610196.
- 768 Griffiths, I., Klugmann, M., Anderson, T., Yool, D., Thomson, C., Schwab, M.H., Schneider,  
769 A., Zimmermann, F., McCulloch, M., Nadon, N., *et al.* (1998). Axonal swellings and  
770 degeneration in mice lacking the major proteolipid of myelin. *Science* 280, 1610-1613.
- 771 Gucek, A., Vardjan, N., and Zorec, R. (2012). Exocytosis in astrocytes: transmitter release  
772 and membrane signal regulation. *Neurochem Res* 37, 2351-2363.
- 773 Halestrap, A.P., and Wilson, M.C. (2012). The monocarboxylate transporter family--role and  
774 regulation. *IUBMB Life* 64, 109-119.
- 775 Hardiman, O., Al-Chalabi, A., Chio, A., Corr, E.M., Logroscino, G., Robberecht, W., Shaw,  
776 P.J., Simmons, Z., and van den Berg, L.H. (2017). Amyotrophic lateral sclerosis. *Nat*  
777 *Rev Dis Primers* 3, 17071.
- 778 Hoogstraaten, R.I., van Keimpema, L., Toonen, R.F., and Verhage, M. (2020). Tetanus  
779 insensitive VAMP2 differentially restores synaptic and dense core vesicle fusion in  
780 tetanus neurotoxin treated neurons. *Sci Rep* 10, 10913.
- 781 Huba, R., and Hofmann, H.D. (1988). Tetanus toxin binding to isolated and cultured rat  
782 retinal glial cells. *Glia* 1, 156-164.
- 783 Jahn, R., and Fasshauer, D. (2012). Molecular machines governing exocytosis of synaptic  
784 vesicles. *Nature* 490, 201-207.
- 785 Jahn, R., and Scheller, R.H. (2006). SNAREs--engines for membrane fusion. *Nat Rev Mol*  
786 *Cell Biol* 7, 631-643.
- 787 Kerr, K.S., Fuentes-Medel, Y., Brewer, C., Barria, R., Ashley, J., Abruzzi, K.C., Sheehan, A.,  
788 Tasdemiir-Yilmaz, O.E., Freeman, M.R., and Budnik, V. (2014). Glial wingless/Wnt  
789 regulates glutamate receptor clustering and synaptic physiology at the *Drosophila*  
790 neuromuscular junction. *J Neurosci* 34, 2910-2920.
- 791 Kuo, I.Y., and Ehrlich, B.E. (2015). Signaling in muscle contraction. *Cold Spring Harb*  
792 *Perspect Biol* 7, a006023.
- 793 Lalli, G., Gschmeissner, S., and Schiavo, G. (2003). Myosin Va and microtubule-based  
794 motors are required for fast axonal retrograde transport of tetanus toxin in motor  
795 neurons. *J Cell Sci* 116, 4639-4650.
- 796 Lee, H.S., Ghetti, A., Pinto-Duarte, A., Wang, X., Dziewczapolski, G., Galimi, F., Huitron-  
797 Resendiz, S., Pina-Crespo, J.C., Roberts, A.J., Verma, I.M., *et al.* (2014). Astrocytes  
798 contribute to gamma oscillations and recognition memory. *Proc Natl Acad Sci U S A*  
799 111, E3343-3352.
- 800 Lee, T., and Luo, L. (1999). Mosaic analysis with a repressible cell marker for studies of gene  
801 function in neuronal morphogenesis. *Neuron* 22, 451-461.
- 802 Lee, Y., Morrison, B.M., Li, Y., Lengacher, S., Farah, M.H., Hoffman, P.N., Liu, Y.,  
803 Tsingalia, A., Jin, L., Zhang, P.W., *et al.* (2012). Oligodendroglia metabolically  
804 support axons and contribute to neurodegeneration. *Nature* 487, 443-448.
- 805 Leiserson, W.M., Harkins, E.W., and Keshishian, H. (2000). Fray, a *Drosophila*  
806 serine/threonine kinase homologous to mammalian PASK, is required for axonal  
807 ensheathment. *Neuron* 28, 793-806.
- 808 Li, H., Russo, A., and DiAntonio, A. (2019). SIK3 suppresses neuronal hyperexcitability by  
809 regulating the glial capacity to buffer K(+) and water. *J Cell Biol* 218, 4017-4029.
- 810 Liu, L., MacKenzie, K.R., Putluri, N., Maletic-Savatic, M., and Bellen, H.J. (2017). The Glia-  
811 Neuron Lactate Shuttle and Elevated ROS Promote Lipid Synthesis in Neurons and  
812 Lipid Droplet Accumulation in Glia via APOE/D. *Cell Metab* 26, 719-737 e716.
- 813 Machler, P., Wyss, M.T., Elsayed, M., Stobart, J., Gutierrez, R., von Faber-Castell, A.,  
814 Kaelin, V., Zuend, M., San Martin, A., Romero-Gomez, I., *et al.* (2016). In Vivo  
815 Evidence for a Lactate Gradient from Astrocytes to Neurons. *Cell Metab* 23, 94-102.

- 816 McMahon, H.T., Ushkaryov, Y.A., Edelman, L., Link, E., Binz, T., Niemann, H., Jahn, R.,  
817 and Sudhof, T.C. (1993). Cellubrevin is a ubiquitous tetanus-toxin substrate  
818 homologous to a putative synaptic vesicle fusion protein. *Nature* *364*, 346-349.
- 819 Nave, K.A. (2010). Myelination and the trophic support of long axons. *Nat Rev Neurosci* *11*,  
820 275-283.
- 821 Oshima, K., and Fehon, R.G. (2011). Analysis of protein dynamics within the septate junction  
822 reveals a highly stable core protein complex that does not include the basolateral  
823 polarity protein Discs large. *J Cell Sci* *124*, 2861-2871.
- 824 Pascual, O., Casper, K.B., Kubera, C., Zhang, J., Revilla-Sanchez, R., Sul, J.Y., Takano, H.,  
825 Moss, S.J., McCarthy, K., and Haydon, P.G. (2005). Astrocytic purinergic signaling  
826 coordinates synaptic networks. *Science* *310*, 113-116.
- 827 Patarnello, T., Bargelloni, L., Rossetto, O., Schiavo, G., and Montecucco, C. (1993).  
828 Neurotransmission and secretion. *Nature* *364*, 581-582.
- 829 Pellerin, L., and Magistretti, P.J. (1994). Glutamate uptake into astrocytes stimulates aerobic  
830 glycolysis: a mechanism coupling neuronal activity to glucose utilization. *Proc Natl*  
831 *Acad Sci U S A* *91*, 10625-10629.
- 832 Perea, G., and Araque, A. (2007). Astrocytes potentiate transmitter release at single  
833 hippocampal synapses. *Science* *317*, 1083-1086.
- 834 Pierre, K., and Pellerin, L. (2005). Monocarboxylate transporters in the central nervous  
835 system: distribution, regulation and function. *J Neurochem* *94*, 1-14.
- 836 Popoff, M.R., and Poulain, B. (2010). Bacterial toxins and the nervous system: neurotoxins  
837 and multipotential toxins interacting with neuronal cells. *Toxins (Basel)* *2*, 683-737.
- 838 Qin, G., Schwarz, T., Kittel, R.J., Schmid, A., Rasse, T.M., Kappei, D., Ponimaskin, E.,  
839 Heckmann, M., and Sigrist, S.J. (2005). Four different subunits are essential for  
840 expressing the synaptic glutamate receptor at neuromuscular junctions of *Drosophila*. *J*  
841 *Neurosci* *25*, 3209-3218.
- 842 Rao, S., Lang, C., Levitan, E.S., and Deitcher, D.L. (2001). Visualization of neuropeptide  
843 expression, transport, and exocytosis in *Drosophila melanogaster*. *J Neurobiol* *49*, 159-  
844 172.
- 845 Regazzi, R., Sadoul, K., Meda, P., Kelly, R.B., Halban, P.A., and Wollheim, C.B. (1996).  
846 Mutational analysis of VAMP domains implicated in Ca<sup>2+</sup>-induced insulin exocytosis.  
847 *EMBO J* *15*, 6951-6959.
- 848 Rummel, A. (2017). Two Feet on the Membrane: Uptake of Clostridial Neurotoxins. *Curr Top*  
849 *Microbiol Immunol* *406*, 1-37.
- 850 Sarov, M., Barz, C., Jambor, H., Hein, M.Y., Schmied, C., Suchold, D., Stender, B., Janosch,  
851 S., K, J.V., Krishnan, R.T., *et al.* (2016). A genome-wide resource for the analysis of  
852 protein localisation in *Drosophila*. *Elife* *5*, e12068.
- 853 Schiavo, G., Benfenati, F., Poulain, B., Rossetto, O., Polverino de Laureto, P., DasGupta,  
854 B.R., and Montecucco, C. (1992). Tetanus and botulinum-B neurotoxins block  
855 neurotransmitter release by proteolytic cleavage of synaptobrevin. *Nature* *359*, 832-  
856 835.
- 857 Schiavo, G., Matteoli, M., and Montecucco, C. (2000). Neurotoxins affecting  
858 neuroexocytosis. *Physiol Rev* *80*, 717-766.
- 859 Schwab, M.E., and Thoenen, H. (1976). Electron microscopic evidence for a transsynaptic  
860 migration of tetanus toxin in spinal cord motoneurons: an autoradiographic and  
861 morphometric study. *Brain Res* *105*, 213-227.
- 862 Schwab, M.E., and Thoenen, H. (1978). Selective binding, uptake, and retrograde transport of  
863 tetanus toxin by nerve terminals in the rat iris. An electron microscope study using  
864 colloidal gold as a tracer. *J Cell Biol* *77*, 1-13.
- 865 Schwabe, T., Bainton, R.J., Fetter, R.D., Heberlein, U., and Gaul, U. (2005). GPCR signaling  
866 is required for blood-brain barrier formation in *drosophila*. *Cell* *123*, 133-144.

- 867 Schwarz, Y., Zhao, N., Kirchhoff, F., and Bruns, D. (2017). Astrocytes control synaptic  
868 strength by two distinct v-SNARE-dependent release pathways. *Nat Neurosci* 20,  
869 1529-1539.
- 870 Sepp, K.J., and Auld, V.J. (1999). Conversion of lacZ enhancer trap lines to GAL4 lines using  
871 targeted transposition in *Drosophila melanogaster*. *Genetics* 151, 1093-1101.
- 872 Sepp, K.J., Schulte, J., and Auld, V.J. (2001). Peripheral glia direct axon guidance across the  
873 CNS/PNS transition zone. *Dev Biol* 238, 47-63.
- 874 Sievers, F., Wilm, A., Dineen, D., Gibson, T.J., Karplus, K., Li, W., Lopez, R., McWilliam,  
875 H., Remmert, M., Soding, J., *et al.* (2011). Fast, scalable generation of high-quality  
876 protein multiple sequence alignments using Clustal Omega. *Mol Syst Biol* 7, 539.
- 877 Sigrist, S.J., Reiff, D.F., Thiel, P.R., Steinert, J.R., and Schuster, C.M. (2003). Experience-  
878 dependent strengthening of *Drosophila* neuromuscular junctions. *J Neurosci* 23, 6546-  
879 6556.
- 880 Simard, M., and Nedergaard, M. (2004). The neurobiology of glia in the context of water and  
881 ion homeostasis. *Neuroscience* 129, 877-896.
- 882 Stewart, B.A., Atwood, H.L., Renger, J.J., Wang, J., and Wu, C.F. (1994). Improved stability  
883 of *Drosophila* larval neuromuscular preparations in haemolymph-like physiological  
884 solutions. *J Comp Physiol A* 175, 179-191.
- 885 Stork, T., Engelen, D., Krudewig, A., Silies, M., Bainton, R.J., and Klambt, C. (2008).  
886 Organization and function of the blood-brain barrier in *Drosophila*. *J Neurosci* 28,  
887 587-597.
- 888 Sudhof, T.C., Baumert, M., Perin, M.S., and Jahn, R. (1989). A synaptic vesicle membrane  
889 protein is conserved from mammals to *Drosophila*. *Neuron* 2, 1475-1481.
- 890 Sun, B., Xu, P., and Salvaterra, P.M. (1999). Dynamic visualization of nervous system in live  
891 *Drosophila*. *Proc Natl Acad Sci U S A* 96, 10438-10443.
- 892 Surana, S., Tosolini, A.P., Meyer, I.F.G., Fellows, A.D., Novoselov, S.S., and Schiavo, G.  
893 (2018). The travel diaries of tetanus and botulinum neurotoxins. *Toxicon* 147, 58-67.
- 894 Sweeney, S.T., Broadie, K., Keane, J., Niemann, H., and O'Kane, C.J. (1995). Targeted  
895 expression of tetanus toxin light chain in *Drosophila* specifically eliminates synaptic  
896 transmission and causes behavioral defects. *Neuron* 14, 341-351.
- 897 Szigeti, K., and Lupski, J.R. (2009). Charcot-Marie-Tooth disease. *Eur J Hum Genet* 17, 703-  
898 710.
- 899 Tiklova, K., Senti, K.A., Wang, S., Graslund, A., and Samakovlis, C. (2010). Epithelial  
900 septate junction assembly relies on melanotransferrin iron binding and endocytosis in  
901 *Drosophila*. *Nat Cell Biol* 12, 1071-1077.
- 902 Ullrich, A., Bohme, M.A., Schoneberg, J., Depner, H., Sigrist, S.J., and Noe, F. (2015).  
903 Dynamical Organization of Syntaxin-1A at the Presynaptic Active Zone. *PLoS*  
904 *computational biology* 11, e1004407.
- 905 Verderio, C., Cagnoli, C., Bergami, M., Francolini, M., Schenk, U., Colombo, A., Riganti, L.,  
906 Frassoni, C., Zuccaro, E., Danglot, L., *et al.* (2012). TI-VAMP/VAMP7 is the SNARE  
907 of secretory lysosomes contributing to ATP secretion from astrocytes. *Biol Cell* 104,  
908 213-228.
- 909 Willison, H.J., Jacobs, B.C., and van Doorn, P.A. (2016). Guillain-Barre syndrome. *Lancet*  
910 388, 717-727.
- 911 Yeh, F.L., Dong, M., Yao, J., Tepp, W.H., Lin, G., Johnson, E.A., and Chapman, E.R. (2010).  
912 SV2 mediates entry of tetanus neurotoxin into central neurons. *PLoS Pathog* 6,  
913 e1001207.
- 914 Yildirim, K., Petri, J., Kottmeier, R., and Klambt, C. (2019). *Drosophila* glia: Few cell types  
915 and many conserved functions. *Glia* 67, 5-26.
- 916 Zhang, B., and Stewart, B. (2010). Electrophysiological recording from *Drosophila* larval  
917 body-wall muscles. *Cold Spring Harb Protoc* 2010, pdb prot5487.

918 Zuchero, J.B., and Barres, B.A. (2015). Glia in mammalian development and disease.  
919 *Development* 142, 3805-3809.
